# Supplementary material
Source: publisher figshare collection journal article supplement (https://gsajournals.figshare.com/articles/dataset/_/8325992)
Supplement: Supplementary file 1 [file 3]

## Sheet: Sheet1
Table S1. Complete MAT locus LOH screen data
								Trial 1 alpha		Trial 2 alpha		Trial 1 a		Trial 2 a
record no.	ORF name	strain	batch	plate	row	col	Comments	A	B	A	B	A	B	A	B		A and B reference the duplicate platings for each trial.
20338	YAL068C	BY4743	01_1	201	A	2		0	0	+	+	+	+	+++	+		ND - no data was collected for this strain
20339	YAL067C	BY4743	01_1	201	A	3		+	0	0	+	0	+	+	0
20340	YAL066W	BY4743	01_1	201	A	4		+	+	+	+	0	+	+	+		ND* = no grow
20341	YAL065C	BY4743	01_1	201	A	5		0	+	0	+	0	0	+	+		ND° = incorrect strain
20345	YAL062W	BY4743	01_1	201	A	6		+	+	0	0	+	+	++	+		ND΅ = lawn growth on SC-HIS without mating
20346	YAL061W	BY4743	01_1	201	A	7		0	+	0	+	++	++	+	++
20347	YAL060W	BY4743	01_1	201	A	8		0	0	0	0	0	+	+	+
20348	YAL059W	BY4743	01_1	201	A	9		0	0	0	0	0	0	+	+
20349	YAL058W	BY4743	01_1	201	A	10	no growth on glycerol plate	0	+	+	0	+	++	++	++
20351	YAL056W	BY4743	01_1	201	A	11		0	+	+	+	+	+	+	+
20352	YAL055W	BY4743	01_1	201	A	12		0	+	+	+	++	+++	++	++
20354	YAL053W	BY4743	01_1	201	B	1		+	+	0	0	0	0	+	+
20355	YAL051W	BY4743	01_1	201	B	2	no growth on auxotrophy plate	ND΅	ND΅	ND΅	ND΅	ND΅	ND΅	ND΅	ND΅
20356	YAL049C	BY4743	01_1	201	B	3		++++	++++	+	+	+	+	++	+
20357	YAL048C	BY4743	01_1	201	B	4		0	0	+	0	0	+	+	+
20359	YAL046C	BY4743	01_1	201	B	5		+	+	0	+	+	0	++	+
20360	YAL045C	BY4743	01_1	201	B	6		+	+	0	+	0	0	0	0
20361	YAL044C	BY4743	01_1	201	B	7		0	+	0	+	+++	++++	++	+++
20362	YAL043C	BY4743	01_1	201	B	8		0	+	0	0	+	+	+	+
20363	YAL042W	BY4743	01_1	201	B	9		+	+	0	+	+	+	+	++
20364	YAL043C-a	BY4743	01_1	201	B	10		0	0	0	+	+	++	+	++
20365	YAL041W	BY4743	01_1	201	B	11		0	+	+	+	+	+	+	+
20366	YAL040C	BY4743	01_1	201	B	12		0	0	0	+	+	+++	+	+
20367	YAL039C	BY4743	01_1	201	C	1		0	0	+	+	+	+	+	++
20368	YAL038W	BY4743	01_1	201	C	2		+	+	+	0	0	+	+	+
20369	YAL037W	BY4743	01_1	201	C	3		0	+	0	0	0	0	++	++
20370	YAL036C	BY4743	01_1	201	C	4	no growth on auxotrophy plate	+	++	+	+	+	0	++	+
20371	YAL035W	BY4743	01_1	201	C	5		ND΅	ND΅	ND΅	ND΅	ND΅	ND΅	ND΅	ND΅
20372	YAL034W-a	BY4743	01_1	201	C	6		+	++	0	+	0	0	0	+
20374	YAL034C	BY4743	01_1	201	C	7		+	+	+	+	0	+	+	+
20375	YAL033W	BY4743	01_1	201	C	8	no growth on auxotrophy plate, slow growth on glycerol plate	0	+	0	+	+	0	+	+
20376	YAL032C	BY4743	01_1	201	C	9	slow growth on auxotrophy plate	0	+	0	+	+	+	+	+
20377	YAL031C	BY4743	01_1	201	C	10	no growth on auxotrophy plate	0	+	0	+	+	+	+	+
20378	YAL030W	BY4743	01_1	201	C	11	slow growth on auxotrophy plate	0	+	0	0	0	+	+	+
20379	YAL029C	BY4743	01_1	201	C	12		0	+	0	+	0	0	0	+
20380	YAL028W	BY4743	01_1	201	D	1		0	+	+	+	+	+	+	+
20381	YAL027W	BY4743	01_1	201	D	2		0	0	+	0	0	0	++	+
20382	YAL026C	BY4743	01_1	201	D	3		0	0	0	+	+	+	+	+
20383	YAL025C	BY4743	01_1	201	D	4		0	0	+	+	+	0	+	+
20385	YAL023C	BY4743	01_1	201	D	5	no growth on auxotrophy plate, no growth on glycerol plate	0	+	0	0	0	0	++++	++
20386	YAL022C	BY4743	01_1	201	D	6		+	0	+	+	0	+	+	+
20387	YAL021C	BY4743	01_1	201	D	7		0	+	0	+	+	+	+	+
20388	YAL020C	BY4743	01_1	201	D	8		+	0	+	0	+	++	+	+
20389	YAL019W	BY4743	01_1	201	D	9		0	0	+	+	+	0	+	+
20390	YAL018C	BY4743	01_1	201	D	10		+	0	++	+++	0	+	++++	+++
20391	YAL017W	BY4743	01_1	201	D	11		ND΅	ND΅	ND΅	ND΅	ND΅	ND΅	ND΅	ND΅
20393	YAL015C	BY4743	01_1	201	D	12		0	+	0	+	+	+	+	++
20394	YAL014C	BY4743	01_1	201	E	1		+	0	+	+	0	0	+	0
20395	YAL013W	BY4743	01_1	201	E	2		0	0	0	+	0	+	+	+
20397	YAL011W	BY4743	01_1	201	E	3		+	0	+	+	+	+	+	+
20398	YAL010C	BY4743	01_1	201	E	4		0	0	0	+	0	0	+	0
20399	YAL009W	BY4743	01_1	201	E	5		0	+	+	+	+	0	+	+
20400	YAL008W	BY4743	01_1	201	E	6		+	+	+	+	+	+	++	+
20401	YAL007C	BY4743	01_1	201	E	7		0	0	0	+	0	+	+	+
20402	YAL004W	BY4743	01_1	201	E	8		++++	++++	0	+	+	+	+	+
20403	YAL005C	BY4743	01_1	201	E	9		++++	+++	++++	++++	0	0	0	0
20404	YAL003W	BY4743	01_1	201	E	10		0	0	+	+	+	+	+	+
20405	YAL002W	BY4743	01_1	201	E	11		+	+	0	0	0	+	+	+
20406	YAL001C	BY4743	01_1	201	E	12		0	+	+	+	+	0	+	+
20407	YAR002W	BY4743	01_1	201	F	1		0	0	0	+	++	++	++++	+++
20408	YAR003W	BY4743	01_1	201	F	2		0	+	0	0	+	+	+	+
20409	YAR007C	BY4743	01_1	201	F	3		+	0	+	+	+	+	++	+
20410	YAR008W	BY4743	01_1	201	F	4		0	+	+	+	+	+	+	+
20413	YAR014C	BY4743	01_1	201	F	5		+	+	0	0	+	0	+	+
20414	YAR015W	BY4743	01_1	201	F	6		0	+	+	+	+	+	++	+
20415	YAR018C	BY4743	01_1	201	F	7	no growth on auxotrophy plate	+++	+++	++++	++++	0	0	0	0
20416	YAR019C	BY4743	01_1	201	F	8		0	+	+	0	+	0	0	+
20417	YAR020C	BY4743	01_1	201	F	9		+	+	0	0	0	+	+	+
20418	YAR023C	BY4743	01_1	201	F	10		0	+	0	+	++	++	+++	+++
20419	YAR027W	BY4743	01_1	201	F	11		0	0	0	0	0	+	+	+
20420	YAR028W	BY4743	01_1	201	F	12		0	+	0	0	+	+	+	++
20421	YAR029W	BY4743	01_1	201	G	1		+	0	+	0	+	++	+++	++
20422	YAR031W	BY4743	01_1	201	G	2		+	0	+	0	0	+	+	+
20423	YAR030C	BY4743	01_1	201	G	3		0	+	+	+	+	+	+	0
20425	YAR035W	BY4743	01_1	201	G	4		0	0	+	0	+	++	+++	+
20426	YAR037W	BY4743	01_1	201	G	5		+	+	+	+	0	+	+	+
20427	YAR040C	BY4743	01_1	201	G	6		+	+	0	+	0	0	+	+
20428	YAR042W	BY4743	01_1	201	G	7		0	0	0	0	+	+	+	+
20429	YAR043C	BY4743	01_1	201	G	8		0	0	0	+	+	+	+	+
20430	YAR044W	BY4743	01_1	201	G	9		0	+	+	+	+	+	+	+
20431	YAR047C	BY4743	01_1	201	G	10		+	0	0	+	+	+	+	+
21489	YLL001W	BY4743	12_1	201	G	11		0	0	0	+	+	+	++	++
21490	YLL002W	BY4743	12_1	201	G	12		+	0	0	+	+	+	++	++
21491	YLL003W	BY4743	12_1	201	H	1		+	+	+	+	+	+	+	+
21492	YLL004W	BY4743	12_1	201	H	2		0	0	+	+	+	+	+	+
21493	YLL005C	BY4743	12_1	201	H	3		0	+	+	0	+	+	+	+
21494	YLL006W	BY4743	12_1	201	H	5		0	+	0	+	+	+	++	+
21496	YLL008W	BY4743	12_1	201	H	6		+	+	0	+	0	+	++	+
21497	YLL009C	BY4743	12_1	201	H	7		0	0	0	0	+	+	+	+
21498	YLL010C	BY4743	12_1	201	H	8		0	+	+	+	+	++	++	++
21499	YLL011W	BY4743	12_1	201	H	9		0	0	+	+	++++	+++	++	++
21500	YLL012W	BY4743	12_1	201	H	10		+	0	+	+	+	+	+	+
21501	YLL013C	BY4743	12_1	201	H	11		+	0	0	0	+	+	+	+
21502	YLL014W	BY4743	12_1	201	H	12		0	0	+	0	+++	++++	++++	+++
21503	YLL015W	BY4743	12_1	202	A	1		+	0	+	0	+	+	+	+
21504	YLL016W	BY4743	12_1	202	A	3		++	+	0	+	+	+	+	+
21505	YLL017W	BY4743	12_1	202	A	4		0	+	+	+	+	+	+	+
21506	YLL018C	BY4743	12_1	202	A	5		0	0	+	+	+	+	0	+
21507	YLL019C	BY4743	12_1	202	A	6		0	0	+	0	+	+	+	+
21508	YLL020C	BY4743	12_1	202	A	7		+	0	0	0	+	+	+	+
21509	YLL021W	BY4743	12_1	202	A	8		0	+	+	0	+	+	+	+
21511	YLL023C	BY4743	12_1	202	A	9		0	+	+	+	+	+	+	+
21512	YLL024C	BY4743	12_1	202	A	10		+	0	+	0	+	+	+	+
21513	YLL025W	BY4743	12_1	202	A	11		0	+	0	+	+	0	+	+
21514	YLL026W	BY4743	12_1	202	A	12		0	0	+	+	+	+	++	++
21515	YLL027W	BY4743	12_1	202	B	1		+	+	+	0	++	+++	++	++++
21516	YLL028W	BY4743	12_1	202	B	2		+	+	0	+	+	+	+	+
21517	YLL029W	BY4743	12_1	202	B	3		0	+	+	+	+	+	0	+
21519	YLL031C	BY4743	12_1	202	B	4		++	+	+	+	0	0	+	+
21520	YLL032C	BY4743	12_1	202	B	5		+	0	+	+	+	+	0	+
21521	YLL033W	BY4743	12_1	202	B	6		+	+	+	0	+	+	+	+
21522	YLL034C	BY4743	12_1	202	B	7		+	+	0	+	+	+	+	+
21523	YLL035W	BY4743	12_1	202	B	8		+	+	+	+	+	+	+	+
21524	YLL036C	BY4743	12_1	202	B	9		+	+	+	+	+	+	+	+
21525	YLL037W	BY4743	12_1	202	B	10		0	0	0	0	+	+	+	+
21526	YLL038C	BY4743	12_1	202	B	11		0	+	+	+	+	+	+	+
21527	YLL039C	BY4743	12_1	202	B	12		0	0	0	+	+	+	+	+
21528	YLL040C	BY4743	12_1	202	C	1		+	+	0	+	+	+	+	+
21529	YLL041C	BY4743	12_1	202	C	2		+	0	0	+	+	+	+	++
21530	YLL042C	BY4743	12_1	202	C	3		0	0	0	0	+	+	+	+
21531	YLL043W	BY4743	12_1	202	C	4		+	+	+	+	+	+	+	+
21533	YLL045C	BY4743	12_1	202	C	5		0	0	+	+	+	0	+	++
21534	YLL046C	BY4743	12_1	202	C	6		0	+	+	+	+	+	+	+
21535	YLL047W	BY4743	12_1	202	C	7		+	+	+	+	+	+	+	+
21538	YLL050C	BY4743	12_1	202	C	8		0	0	+	+	+	+	+	+
21539	YLL051C	BY4743	12_1	202	C	9		0	+	+	0	0	+	+	+
21540	YLL052C	BY4743	12_1	202	C	10		0	0	+	0	++	+++	++	++
21541	YLL053C	BY4743	12_1	202	C	11		0	0	+	0	0	0	+	+
21542	YLL054C	BY4743	12_1	202	C	12		0	+	0	+	+	+	+	+
21543	YLL055W	BY4743	12_1	202	D	1		+	+	0	0	+	++	++	++
21544	YLL056C	BY4743	12_1	202	D	2		+	0	+	0	0	+	+	+
21545	YLL057C	BY4743	12_1	202	D	3		0	0	+	0	0	0	+	+
21546	YLL058W	BY4743	12_1	202	D	4		0	0	+	+	0	+	+	+
21548	YLL060C	BY4743	12_1	202	D	5		0	0	+	+	+	+	+	+
21549	YLL061W	BY4743	12_1	202	D	6		+	+	0	+	+	+	+	+
21550	YLL062C	BY4743	12_1	202	D	7		+	0	+	+	+	+	+	+
21551	YLL063C	BY4743	12_1	202	D	8		+	0	+	+	+	0	+	+
21556	YLR001C	BY4743	12_1	202	D	9		+	0	+	+	+	+	+	+
21557	YLR002C	BY4743	12_1	202	D	10		+	+	+	+	+	0	+	+
21558	YLR003C	BY4743	12_1	202	D	11		0	0	+	0	+	+	+	+
21559	YLR004C	BY4743	12_1	202	D	12		0	0	+	0	+	+	+	+
21560	YLR005W	BY4743	12_1	202	E	1		+	0	+	0	++	++	+	++
21562	YLR007W	BY4743	12_1	202	E	2		0	0	0	0	+	+	+	+
21563	YLR008C	BY4743	12_1	202	E	3		+	0	+	+	+	+	+	++
21564	YLR009W	BY4743	12_1	202	E	4		0	0	0	+	+	+	+	++
21565	YLR010C	BY4743	12_1	202	E	5		0	+	0	+	+	+	+	++
21566	YLR011C	BY4743	12_1	202	E	6		0	+	+	+	+	+	+	++
21567	YLR012C	BY4743	12_1	202	E	7		+	+	0	+	+	+	+	++
21568	YLR013W	BY4743	12_1	202	E	8		+	+	+	+	+	+	+	+
21569	YLR014C	BY4743	12_1	202	E	9		+	+	+	+	0	+	+	+
21570	YLR015W	BY4743	12_1	202	E	10		0	+	0	+	+	+	+	+
21571	YLR016C	BY4743	12_1	202	E	11		+	+	+	+	0	0	+	+
21572	YLR017W	BY4743	12_1	202	E	12		+	+	+	+	0	+	+	+
21573	YLR018C	BY4743	12_1	202	F	1		+	0	+	+	++	++	+	++
21574	YLR019W	BY4743	12_1	202	F	2		+	+	+	+	+	++	+	++
21575	YLR020C	BY4743	12_1	202	F	3		+	0	+	+	0	0	+	+
21576	YLR021W	BY4743	12_1	202	F	4		+	0	+	+	+	+	+	+
21577	YLR022C	BY4743	12_1	202	F	5		0	+	+	+	+	0	0	0
21578	YLR023C	BY4743	12_1	202	F	6		0	+	+	0	+	+	+	+
21579	YLR024C	BY4743	12_1	202	F	7		+	+	+	0	0	+	+	+
21580	YLR025W	BY4743	12_1	202	F	8		0	0	+	+	+	+	+	+
21581	YLR026C	BY4743	12_1	202	F	9		0	+	+	+	+	+	+	+
21582	YLR027C	BY4743	12_1	202	F	10		0	+	+	+	+	+	++	+
21583	YLR028C	BY4743	12_1	202	F	11		+	0	+	0	+++	+++	++++	++++
21584	YLR029C	BY4743	12_1	202	F	12		+	0	0	+	+++	++++	++++	++
22653	YLR042C	BY4743	12_2	202	G	1		+	0	0	+	+	0	0	+
22654	YLR043C	BY4743	12_2	202	G	2		+	+	+	+	+	+	0	+
22655	YLR044C	BY4743	12_2	202	G	3		+	0	0	+	+	+	+	+
22656	YLR045C	BY4743	12_2	202	G	4		+	+	0	+	++	++	++	+++
22657	YLR046C	BY4743	12_2	202	G	5		0	0	0	0	+	+	+	+
22658	YLR047C	BY4743	12_2	202	G	6		+	+	+	+	+	+	+	++
22659	YLR048W	BY4743	12_2	202	G	7		0	+	+	+	++	++	++	+++
22660	YLR049C	BY4743	12_2	202	G	8		0	+	+	0	++	+	++	+++
22662	YLR051C	BY4743	12_2	202	G	9		0	0	+	+	0	+	+	0
22664	YLR053C	BY4743	12_2	202	G	10		+	0	+	+	++	++	++	+++
22665	YLR054C	BY4743	12_2	202	G	11		++	+	+	+	+	+	++	+++
22666	YLR055C	BY4743	12_2	202	G	12		0	+	+	+	+	+	+	+
22667	YLR056W	BY4743	12_2	202	H	1		0	+	+	+	+	+	+	+
22668	YLR057W	BY4743	12_2	202	H	2		0	+	+	+	++	+	+	++
22669	YLR058C	BY4743	12_2	202	H	3		+	+	+	+	+	+	+	+
22670	YLR059C	BY4743	12_2	202	H	5		+	0	+	+	0	+	+	+
22671	YLR060W	BY4743	12_2	202	H	6		+	+	+	+	+	+	+	+
22672	YLR061W	BY4743	12_2	202	H	7		+	0	+	+	+	+	+	++
22673	YLR062C	BY4743	12_2	202	H	8		+	+	+	+	+	++	+	+
22674	YLR063W	BY4743	12_2	202	H	9		+	+	+	0	+	+	+	+
22675	YLR064W	BY4743	12_2	202	H	10		+	+	+	0	++++	++++	+++	+++
22676	YLR065C	BY4743	12_2	202	H	11		+	+	+	0	+	+	+	+
22677	YLR066W	BY4743	12_2	202	H	12		+	0	+	0	+++	++++	++++	++++
22678	YLR067C	BY4743	12_2	203	A	1		0	+	0	+	+	+	+	+
22679	YLR068W	BY4743	12_2	203	A	2		0	0	+	0	+	+	+	+
22681	YLR070C	BY4743	12_2	203	A	4		+	+	+	0	+	+	+	+
22682	YLR071C	BY4743	12_2	203	A	5		0	+	+	0	+	+	+	+
22683	YLR072W	BY4743	12_2	203	A	6		0	0	+	0	+	0	+	+
22684	YLR073C	BY4743	12_2	203	A	7		0	+	+	0	+	+	+	+
22685	YLR074C	BY4743	12_2	203	A	8		+	+	+	+	+	0	+	+
22686	YLR075W	BY4743	12_2	203	A	9		+	0	0	+	0	+	+	+
22687	YLR076C	BY4743	12_2	203	A	10		+	0	+	+	+	+	+	+
22688	YLR077W	BY4743	12_2	203	A	11		0	+	+	+	0	0	+	0
22689	YLR078C	BY4743	12_2	203	A	12		0	+	+	0	+	+	0	0
22690	YLR079W	BY4743	12_2	203	B	1		0	0	+	+	+	++	+	+
22691	YLR080W	BY4743	12_2	203	B	2		0	+	+	0	+	+	+	+
22692	YLR081W	BY4743	12_2	203	B	3		0	+	+	+	+	+	+	+
22693	YLR082C	BY4743	12_2	203	B	4		+	+	+	0	+	+	+	0
22694	YLR083C	BY4743	12_2	203	B	5		0	+	+	+	+	+	+	+
22695	YLR084C	BY4743	12_2	203	B	6		0	0	+	0	+	+	+	0
22696	YLR085C	BY4743	12_2	203	B	7		0	0	+	0	+	+	+	+
22697	YLR086W	BY4743	12_2	203	B	8		0	+	0	+	0	0	0	+
22698	YLR087C	BY4743	12_2	203	B	9		+	0	+	0	++	+	++	++
22699	YLR088W	BY4743	12_2	203	B	10		+	0	+	+	+	+	+	+
22700	YLR089C	BY4743	12_2	203	B	11		+	+	+	0	+	0	+	+
22701	YLR090W	BY4743	12_2	203	B	12		+	0	+	+	+	+	+	+
22702	YLR091W	BY4743	12_2	203	C	1		0	+	+	0	+	+	+	+
22703	YLR092W	BY4743	12_2	203	C	2		0	+	+	+	+	+	+	+
22704	YLR093C	BY4743	12_2	203	C	3		+	+	+	+	+	+	+	+
22705	YLR094C	BY4743	12_2	203	C	4		+	+	+	+	0	+	+	+
22706	YLR095C	BY4743	12_2	203	C	5		0	0	+	0	+	+	+	+
22707	YLR096W	BY4743	12_2	203	C	6		0	+	+	+	0	0	+	+
22708	YLR097C	BY4743	12_2	203	C	7		0	+	+	+	+	+	+	+
22709	YLR098C	BY4743	12_2	203	C	8		0	0	+	+	+	+	+	+
22710	YLR099C	BY4743	12_2	203	C	9		+	+	+	+	+	+	+	+
22711	YLR100W	BY4743	12_2	203	C	10		+	+	+	+	+	+	+	+
22712	YLR101C	BY4743	12_2	203	C	11		0	0	0	0	+	+	+	+
22713	YLR102C	BY4743	12_2	203	C	12		0	+	0	+	+	+	++	+
22714	YLR103C	BY4743	12_2	203	D	1		0	0	+	0	+	+	+	+
22715	YLR104W	BY4743	12_2	203	D	2		+	0	+	+	+	+	+	+
22716	YLR105C	BY4743	12_2	203	D	3		0	+	0	+++	+	+	+	+
22717	YLR106C	BY4743	12_2	203	D	4		0	0	0	+	+	0	+	0
22718	YLR107W	BY4743	12_2	203	D	5		+	0	+	+	+	+	+	+
22719	YLR108C	BY4743	12_2	203	D	6		+	+	0	+	0	+	+	+
22720	YLR109W	BY4743	12_2	203	D	7		0	0	0	+	+	+	+	+
22722	YLR111W	BY4743	12_2	203	D	8		0	+	+	+	+	++	+	++
22723	YLR112W	BY4743	12_2	203	D	9		0	0	+	+	+	+	+	+
22724	YLR113W	BY4743	12_2	203	D	10		+	+	0	+	+	+	+	+
22725	YLR114C	BY4743	12_2	203	D	11		+	0	+	0	+	+	+	+
22726	YLR115W	BY4743	12_2	203	D	12		0	+	+	+	+	+	+	+
22727	YLR116W	BY4743	12_2	203	E	1		0	0	+	+	+	+	+	+
22728	YLR117C	BY4743	12_2	203	E	2		+	+	+	0	+	+	+	0
22729	YLR118C	BY4743	12_2	203	E	3		+	+	+	+	++	+	+	+
22730	YLR119W	BY4743	12_2	203	E	4		0	0	+	+	++	+	+	+
22731	YLR120C	BY4743	12_2	203	E	5		+	0	0	+	+	0	+	0
22732	YLR121C	BY4743	12_2	203	E	6		+	+	0	+	+	+	+	+
22733	YLR122C	BY4743	12_2	203	E	7		0	0	+	+	0	+	+	+
22734	YLR123C	BY4743	12_2	203	E	8		+	+	+	++	+++	+++	++	+++
22735	YLR124W	BY4743	12_2	203	E	9		+	+	+	+++	+	+	+	+
22736	YLR125W	BY4743	12_2	203	E	10		+	0	+	0	+	+	0	+
20481	YML089C	BY4743	13_1	203	E	11		ND΅	ND΅	ND΅	ND΅	ND΅	ND΅	ND΅	ND΅
20482	YML088W	BY4743	13_1	203	E	12		ND΅	ND΅	ND΅	ND΅	ND΅	ND΅	ND΅	ND΅
20483	YML087C	BY4743	13_1	203	F	1		ND΅	ND΅	ND΅	ND΅	ND΅	ND΅	ND΅	ND΅
20484	YML086C	BY4743	13_1	203	F	2		ND΅	ND΅	ND΅	ND΅	ND΅	ND΅	ND΅	ND΅
20486	YML084W	BY4743	13_1	203	F	3		ND΅	ND΅	ND΅	ND΅	ND΅	ND΅	ND΅	ND΅
20487	YML083C	BY4743	13_1	203	F	4	slow growth on glycerol plate	ND΅	ND΅	ND΅	ND΅	ND΅	ND΅	ND΅	ND΅
20488	YML082W	BY4743	13_1	203	F	5		ND΅	ND΅	ND΅	ND΅	ND΅	ND΅	ND΅	ND΅
20489	YML081W	BY4743	13_1	203	F	6		ND΅	ND΅	ND΅	ND΅	ND΅	ND΅	ND΅	ND΅
20490	YML080W	BY4743	13_1	203	F	7		ND΅	ND΅	ND΅	ND΅	ND΅	ND΅	ND΅	ND΅
20491	YML097W	BY4743	13_1	203	F	8		ND΅	ND΅	ND΅	ND΅	ND΅	ND΅	ND΅	ND΅
20492	YML078W	BY4743	13_1	203	F	9		ND΅	ND΅	ND΅	ND΅	ND΅	ND΅	ND΅	ND΅
20505	YML065W	BY4743	13_1	203	F	10		+	+	+	0	+	+	+	+
20506	YML064C	BY4743	13_1	203	F	11		+	+	0	0	++	++	+	+
20507	YML063W	BY4743	13_1	203	F	12		+	0	+	0	++	+	+	+
20508	YML062C	BY4743	13_1	203	G	1		+	0	+	0	+	+	++	+
20509	YML061C	BY4743	13_1	203	G	2		0	0	+	+	+	+	++	+
20511	YML059C	BY4743	13_1	203	G	3		+	+	+	+	+	+	+	+
20512	YML058W	BY4743	13_1	203	G	4	slow growth on glycerol plate	0	+	+	+	+	+	+	+
20513	YML057W	BY4743	13_1	203	G	5		0	0	+	0	+	+	+	+
20514	YML058C-A	BY4743	13_1	203	G	6	slow growth on glycerol plate	0	0	+	+	+	+	+	+
20515	YML056C	BY4743	13_1	203	G	7		0	+	+	0	+	+	+	+
20516	YML055W	BY4743	13_1	203	G	8		+	+	+	+	+	+	+	+
20517	YML054C	BY4743	13_1	203	G	9		0	+	+	+	+	+	+	++
20518	YML053C	BY4743	13_1	203	G	10		0	0	+	+	+	+	+	+
20520	YML051W	BY4743	13_1	203	G	11		+	0	+	+	+	0	+	+
20521	YML050W	BY4743	13_1	203	G	12		+	0	+	+	+	+	+	+
20522	YML049C	BY4743	13_1	203	H	1		0	+	0	+	+	+	+	+
20523	YML048W	BY4743	13_1	203	H	2		0	+	+	+	++	++	++	++
20524	YML048W-A	BY4743	13_1	203	H	3		0	0	+	+	+	+	+	+
20528	YML043C	BY4743	13_1	203	H	5		0	+	+	0	+	+	+	++
20534	YML037C	BY4743	13_2	203	H	6		0	0	+	+	+++	++++	+++	++++
20537	YML034W	BY4743	13_2	203	H	7		+	+	+	+	+	+	+	+
20538	YML035C-A	BY4743	13_2	203	H	8		0	0	0	+	+	+	++	++
20539	YML033W	BY4743	13_2	203	H	9		+	0	+	+	+	+	+	+
20540	YML032C	BY4743	13_2	203	H	10		0	0	0	0	+	+	+	+
20543	YML030W	BY4743	13_2	203	H	11		0	0	+	0	+	+	+	+
20544	YML029W	BY4743	13_2	203	H	12		0	+	+	0	++	+++	++	++
20545	YML028W	BY4743	13_2	204	A	1		+	+	0	+	+	+	+	+
20547	YML026C	BY4743	13_2	204	A	2	slow growth on glycerol plate	+	0	+	+	+	+	+	+
20548	YML025C	BY4743	13_2	204	A	3		+	+	+	+	+	+	+	+
20549	YML024W	BY4743	13_2	204	A	5		0	+	+	0	+	+	++	++
20550	YML023C	BY4743	13_2	204	A	6		+	+	+	0	+	+	+	++
20553	YML020W	BY4743	13_2	204	A	7		0	0	+	+	+	+	+	+
20554	YML019W	BY4743	13_2	204	A	8		++	++	++	++	0	0	+	+
20555	YML018C	BY4743	13_2	204	A	9		+	+	+	0	+	+	+	++
20556	YML017W	BY4743	13_2	204	A	10		0	0	+	0	++	+	++	++
20557	YML016C	BY4743	13_2	204	A	11		0	+	+	0	+	+	++	+++
20558	YML015C	BY4743	13_2	204	A	12		+	0	0	+	++	+	+	+
20559	YML014W	BY4743	13_2	204	B	1	slow growth on auxotrophy plate, slow growth on glycerol plate	+	+	+	+	+	+	+	+
20560	YML013W	BY4743	13_2	204	B	2		+	+	0	0	+	+	+	+
20561	YML013C-A	BY4743	13_2	204	B	3		+	+	+	0	+	+	+	+
20562	YML012W	BY4743	13_2	204	B	4		0	0	+	0	+	+	+	+
20563	YML011C	BY4743	13_2	204	B	5		0	+	0	+	+	+	+	+
20564	YML010W	BY4743	13_2	204	B	6		0	+	+	+	+	+	+	+
20565	YML010W-A	BY4743	13_2	204	B	7		+	+	0	+	++	+	+	++
20567	YML009c	BY4743	13_2	204	B	8		0	0	+	0	+	+	++	++
20568	YML008C	BY4743	13_2	204	B	9		0	0	0	0	++	+	++	++
20569	YML007W	BY4743	13_2	204	B	10		+	0	0	0	+	+	+	+
20570	YML006C	BY4743	13_2	204	B	11		0	+	+	+	+	+	+	++
20571	YML005W	BY4743	13_2	204	B	12		+	0	+	0	+	0	+	+
20572	YML004C	BY4743	13_2	204	C	1		0	0	+	+	+	+	+	+
20573	YML003W	BY4743	13_2	204	C	2		+	0	0	+	+	+	+	++
20574	YML002W	BY4743	13_2	204	C	3		0	0	+	0	+	+	+	+
20575	YML001W	BY4743	13_2	204	C	4		+	0	+	+	++	+	+++	+
20576	YMR001C	BY4743	13_2	204	C	5		0	+	+	0	+	+	+	+
20578	YMR003W	BY4743	13_2	204	C	6		+	0	0	+	+	+	+	+
20580	YMR005W	BY4743	13_2	204	C	7		0	0	0	0	+	+	++	+
20581	YMR006C	BY4743	13_2	204	C	8		0	0	+	+	+	+	+	++
20582	YMR007W	BY4743	13_2	204	C	9		0	+	0	+	+	+	++	++
20583	YMR008C	BY4743	13_2	204	C	10		+	0	+	+	0	+	+	+
20584	YMR009W	BY4743	13_2	204	C	11		0	+	+	+	+	0	+	+
20585	YMR010W	BY4743	13_2	204	C	12		0	+	0	0	+	+	+	++
20586	YMR011W	BY4743	13_2	204	D	1		0	0	0	0	++	+	++	+
20587	YMR012W	BY4743	13_2	204	D	2		+	+	+	0	++	++	+++	+++
20588	YMR013C	BY4743	13_2	204	D	3		0	0	0	0	+	+	++	++
20590	YMR015C	BY4743	13_2	204	D	4		+	0	+	+	+	+	+	+
20591	YMR016C	BY4743	13_2	204	D	5		0	+	0	0	+	0	+	+
20592	YMR017W	BY4743	13_2	204	D	6		0	0	+	0	+	+	++	+
20593	YMR018W	BY4743	13_2	204	D	7		+	0	+	+	+	+	+	++
20594	YMR019W	BY4743	13_2	204	D	8		0	+	0	+	+	+	+	+
20595	YMR020W	BY4743	13_2	204	D	9		0	0	+	+	+	+	++	++
20596	YMR021C	BY4743	13_2	204	D	10		+	+	+	+	+	+	+	+
20597	YMR022W	BY4743	13_2	204	D	11		0	0	+	+	+	+	+	+
20598	YMR023C	BY4743	13_2	204	D	12		+	+	0	+	0	+	+	+
20599	YMR024W	BY4743	13_2	204	E	1		0	+	0	+	+	+	+	+
20600	YMR025W	BY4743	13_2	204	E	2		0	0	+	+	+	+	+	+
20601	YMR026C	BY4743	13_2	204	E	3		+	0	0	0	+	+	+	+
20602	YMR027W	BY4743	13_2	204	E	4		0	0	0	0	0	0	++	+
20603	YMR028W	BY4743	13_2	204	E	5		+	0	+	0	+	+	++	+
20604	YMR029C	BY4743	13_2	204	E	6		0	+	0	+	+++	+	+++	++
20605	YMR030W	BY4743	13_2	204	E	7		0	+	+	+	+	+	+	+
20606	YMR031W-A	BY4743	13_2	204	E	8		0	+	0	0	+	0	+	++
20607	YMR031C	BY4743	13_2	204	E	9		0	0	+	0	+	+	+	++
20608	YMR032W	BY4743	13_2	204	E	10		0	+	0	0	+	+	+	++
20609	YMR033W	BY4743	13_2	204	E	11		0	0	0	0	0	+	+	+
20610	YMR034C	BY4743	13_2	204	E	12	slow growth on auxotrophy plate	+	+	+	0	+	+	+	+
20611	YMR035W	BY4743	13_2	204	F	1	slow growth on auxotrophy plate	+	+	+	+	0	0	+	+
20612	YMR036C	BY4743	13_2	204	F	2		+	0	0	+	+	+	+	+
20615	YMR039C	BY4743	13_2	204	F	3		+	0	+	0	+	0	+	+
20616	YMR040W	BY4743	13_2	204	F	4		0	0	+	0	+	+	++	+
20617	YMR041C	BY4743	13_2	204	F	5		+	0	0	+	+	+	++	+
20618	YMR042W	BY4743	13_2	204	F	6		+	0	0	0	+	0	+	+
20619	YMR043W	BY4743	13_2	204	F	7		0	+	0	0	0	+	+	+
20620	YMR044W	BY4743	13_2	204	F	8		+	+	+	0	+	+	+++	+++
20623	YMR047C	BY4743	13_2	204	F	9		0	+	+	0	0	+	+	+
20721	YMR140W	BY4743	13_4	204	F	10		0	0	+	0	+	+	+	++
20722	YMR141C	BY4743	13_4	204	F	11		0	0	+	0	+	+	+	+
20724	YMR143W	BY4743	13_4	204	F	12		+	0	0	0	+	+	+	+
20725	YMR144W	BY4743	13_4	204	G	1		+	0	0	+	+	+	++	++
20726	YMR145C	BY4743	13_4	204	G	2		+	+	+	0	0	+	+	+
20727	YMR146C	BY4743	13_4	204	G	3		0	+	0	+	+	+	+	++
20728	YMR147W	BY4743	13_4	204	G	4		+	+	0	0	+	+	+	+
20729	YMR148W	BY4743	13_4	204	G	5		0	0	+	0	+	+	+	+
20730	YMR149W	BY4743	13_4	204	G	6		0	+	+	0	+++	+++	+++	++
20731	YMR151W	BY4743	13_4	204	G	7		0	0	+	0	+	+	+	+
20732	YMR150C	BY4743	13_4	204	G	8		0	+	0	0	+	+	+	+
20733	YMR152W	BY4743	13_4	204	G	9		0	0	+	0	+	++	+	++
20734	YMR153W	BY4743	13_4	204	G	10		0	+	0	0	0	+	+	+
20735	YMR153C-A	BY4743	13_4	204	G	11		0	0	+	0	+++	+++	+++	++++
20737	YMR155W	BY4743	13_4	204	G	12		0	0	0	0	+	+	+	++
20738	YMR156C	BY4743	13_4	204	H	1		0	0	0	0	+	+	++	+
20739	YMR157C	BY4743	13_4	204	H	2		0	+	+	+	+	+	+	+
20741	YMR158W-A	BY4743	13_4	204	H	3		0	+	0	+	+	+	+	+
20841	YMR255W	BY4743	13_5	204	H	5		+	+	0	+	+	+	++	+
20842	YMR256C	BY4743	13_5	204	H	6		+	0	+	0	+	+	+	+
20843	YMR257C	BY4743	13_5	204	H	7		+	0	+	0	++	++	++	++
20845	YMR259C	BY4743	13_5	204	H	8		0	+	0	0	+	+	+	++
20846	YMR260C	BY4743	13_5	204	H	9		0	+	+	+	+	+	+	+
20848	YMR262W	BY4743	13_5	204	H	10		+	0	+	0	+	+	+	+
20849	YMR263W	BY4743	13_5	204	H	11		0	0	+	+	+	+	+	+
20850	YMR264W	BY4743	13_5	204	H	12		0	0	+	0	+	+	+	+
20742	YMR159C	BY4743	13_4	205	A	1		+	+	0	0	+	+	+	+
20743	YMR160W	BY4743	13_4	205	A	2		0	+	0	+	+++	++	+++	+++
20744	YMR161W	BY4743	13_4	205	A	3		+	+	+	0	0	+	+	+
20745	YMR162C	BY4743	13_4	205	A	4		0	0	0	+	+	+	+	+
20746	YMR163C	BY4743	13_4	205	A	6		+	+	0	+	+	+	+	+
20747	YMR164C	BY4743	13_4	205	A	7		+	0	+	+	+	+	+	+
20748	YMR165C	BY4743	13_4	205	A	8		+	0	0	0	+	+	++	+
20749	YMR166C	BY4743	13_4	205	A	9		+	0	+	+	+	+	+	+
20750	YMR167W	BY4743	13_4	205	A	10		+	+	+	+	+	+	+	+
20751	YMR168C	BY4743	13_4	205	A	11		0	0	+	+	+	+	+	+
20752	YMR169C	BY4743	13_4	205	A	12		+	0	+	+	+	+	+	+
20753	YMR170C	BY4743	13_4	205	B	1		+	0	+	+	++	+	+	+
20756	YMR172C-A	BY4743	13_4	205	B	2		+	0	0	0	+	0	+	+
20757	YMR173W	BY4743	13_4	205	B	3		0	0	0	0	++	+	+	+
20758	YMR173W-A	BY4743	13_4	205	B	4		0	0	+	+	+	+	0	+
20759	YMR174C	BY4743	13_4	205	B	5		0	+	0	0	0	+	+	+
20760	YMR175W	BY4743	13_4	205	B	6		+	0	+	+	0	+	+	+
20761	YMR176W	BY4743	13_4	205	B	7		0	0	+	+	+	+	+	+
20762	YMR177W	BY4743	13_4	205	B	8		0	+	0	0	+	+	+	+
20763	YMR178W	BY4743	13_4	205	B	9		0	+	+	0	+	+	++	+
20764	YMR179W	BY4743	13_4	205	B	10		+	0	0	0	+	+	+	+
20765	YMR180C	BY4743	13_4	205	B	11		+	+	+	+	++	+	++	+
20767	YMR182C	BY4743	13_4	205	B	12		0	0	0	0	+	+	+	+
20768	YMR183C	BY4743	13_4	205	C	1		+	0	0	0	++	+	+	+
20769	YMR184W	BY4743	13_4	205	C	2		0	0	+	+	+	++	+	++
20770	YMR185W	BY4743	13_4	205	C	3		+	+	0	+	+	+	+	+
20771	YMR186W	BY4743	13_4	205	C	4		0	+	+	0	+	++	+++	+++
20772	YMR187C	BY4743	13_4	205	C	5		0	+	+	0	+	0	+	+
20773	YMR188C	BY4743	13_4	205	C	6		+	+	0	0	+	++	++	+++
20774	YMR189W	BY4743	13_4	205	C	7		0	0	0	0	+	0	+	+
20775	YMR190C	BY4743	13_4	205	C	8		+	+	0	0	+	+	+	+
20776	YMR191W	BY4743	13_4	205	C	9		+	+	+	0	0	0	+	+
20777	YMR192W	BY4743	13_4	205	C	10		+	0	0	0	+	+	+++	+
20778	YMR193W	BY4743	13_4	205	C	11		0	+	0	+	+	+	+++	+
20779	YMR194W	BY4743	13_4	205	C	12		0	0	0	0	+++	+++	++++	++
20780	YMR193C-A	BY4743	13_4	205	D	1		0	0	+	0	++	+	+	+
20781	YMR195W	BY4743	13_4	205	D	2		+	+	0	+	+	+	+	+
20782	YMR196W	BY4743	13_4	205	D	3		0	+	0	0	+	+	++	++
20783	YMR197C	BY4743	13_4	205	D	4		0	0	0	0	+	+	+	+
20784	YMR198W	BY4743	13_4	205	D	5		0	+	0	+	+	0	0	+
20785	YMR199W	BY4743	13_4	205	D	6		+	+	0	+	0	+	+	+
20786	YMR200W	BY4743	13_4	205	D	7		0	+	0	+	+	+	+	+
20787	YMR201C	BY4743	13_4	205	D	8		+	+	0	+	+	+	+	+
20788	YMR202W	BY4743	13_4	205	D	9		+	+	0	+	+	+	+	+
20789	YMR203W	BY4743	13_4	205	D	10		0	+	0	0	++	++++	++	++
20790	YMR204C	BY4743	13_4	205	D	11		0	+	+	+	+	+	+	+
20791	YMR205C	BY4743	13_4	205	D	12		0	+	+	0	+	+	++	++
20792	YMR206W	BY4743	13_4	205	E	1		0	0	0	0	+	+	+	+
20793	YMR207C	BY4743	13_4	205	E	2		0	+	0	0	+	+	+	+
20794	YMR208W	BY4743	13_4	205	E	3		0	0	+	0	0	+	0	+
20796	YMR210W	BY4743	13_4	205	E	4	slow growth on auxotrophy plate	0	0	0	0	+	0	+	+
20797	YMR211W	BY4743	13_4	205	E	5		0	0	+	+	0	+	+	+
20799	YMR213W	BY4743	13_4	205	E	6		+	0	+	0	++	+++	++	++
20800	YMR214W	BY4743	13_4	205	E	7		+	+	0	0	+	+	+	+
20801	YMR215W	BY4743	13_4	205	E	8	slow growth on auxotrophy plate	+	0	0	0	+	+	+	+
20802	YMR216C	BY4743	13_4	205	E	9		0	+	0	0	+	+	+	0
20803	YMR217W	BY4743	13_4	205	E	10	slow growth on glycerol plate	0	+	+	0	+	+	+	+
20804	YMR218C	BY4743	13_4	205	E	11		+	0	+	+	+	+	+	+
20805	YMR219W	BY4743	13_4	205	E	12		+	+	+	+	+	+	+	+
20806	YMR220W	BY4743	13_4	205	F	1		0	+	0	+	+	0	0	+
20807	YMR221C	BY4743	13_4	205	F	2		+	0	0	+	+	+	+	+
20808	YMR222C	BY4743	13_4	205	F	3		+	0	0	0	+	+	+	+
20809	YMR223W	BY4743	13_4	205	F	4		+	0	0	0	+	0	+	+
20810	YMR224C	BY4743	13_4	205	F	5		+	0	0	0	+	++	+++	++
20811	YMR225C	BY4743	13_4	205	F	6		+	+	+	+	+	+	0	+
20812	YMR226C	BY4743	13_4	205	F	7		0	+	0	0	+	+	+	+
20813	YMR227C	BY4743	13_4	205	F	8		0	+	0	+	++	+++	++	+
20814	YMR228W	BY4743	13_4	205	F	9		0	+	+	+	+	+	+	+
20815	YMR229C	BY4743	13_4	205	F	10		+	+	+	+	+	+	++	+
20816	YMR230W	BY4743	13_4	205	F	11	slow growth on auxotrophy plate	+	0	0	+	+	+	+	+
20817	YMR231W	BY4743	13_5	205	F	12		+	+	+	+	+	0	+	+
20818	YMR232W	BY4743	13_5	205	G	1	slow growth on glycerol plate	+	+	0	+	+	+	+	+
20819	YMR233W	BY4743	13_5	205	G	2		+	+	0	0	+	+	0	+
20820	YMR234W	BY4743	13_5	205	G	3		+	+	+	+	0	+	+	0
20821	YMR235C	BY4743	13_5	205	G	4	slow growth on glycerol plate	+	+	0	0	0	+	+	+
20822	YMR236W	BY4743	13_5	205	G	5		+	+	+	+	+	+	+	+
20823	YMR237W	BY4743	13_5	205	G	6		0	0	0	0	+	+	+	+
20824	YMR238W	BY4743	13_5	205	G	7		+	0	+	+	++	++	++	++
20825	YMR239C	BY4743	13_5	205	G	8		+	+	0	0	+	+	+	+
20826	YMR240C	BY4743	13_5	205	G	9		+	+	+	+	+	+	+	+
20827	YMR241W	BY4743	13_5	205	G	10		+	+	+	+	+	+	+	+
20828	YMR242C	BY4743	13_5	205	G	11		+	0	0	+	+	+	+	+
20829	YMR243C	BY4743	13_5	205	G	12		+	+	+	+	++++	++	+++	+
20830	YMR244W	BY4743	13_5	205	H	1		+	+	+	0	+	+	0	++
20831	YMR245W	BY4743	13_5	205	H	2		+	0	+	+	+	+	0	+
20832	YMR244C-A	BY4743	13_5	205	H	3		++++	++++	++	++	0	+	0	0
20833	YMR246W	BY4743	13_5	205	H	5		+	+	+	0	0	0	+	+
20834	YMR247C	BY4743	13_5	205	H	6		+	0	0	0	+	+	+	+
20835	YMR250W	BY4743	13_5	205	H	7		+	+	0	0	+++	+++	++++	++
20836	YMR251W	BY4743	13_5	205	H	8		0	0	+	+	0	+	+	+
20837	YMR251W-A	BY4743	13_5	205	H	9		+	0	+	0	0	0	+	+
20838	YMR252C	BY4743	13_5	205	H	10		+	+	0	0	++	+	+	+
20839	YMR253C	BY4743	13_5	205	H	11		0	0	0	0	+	+	0	0
20840	YMR254C	BY4743	13_5	205	H	12		0	+	+	+	+	++	++	+
20851	YMR265C	BY4743	13_5	206	A	1		0	0	0	+	+	+	+	++
20853	YMR267W	BY4743	13_5	206	A	2		0	+	+	0	+	+	+	+
20854	YMR268C	BY4743	13_5	206	A	3		+	0	+	+	++	+	++	+++
20855	YMR269W	BY4743	13_5	206	A	4		0	0	+	0	+	0	+	+
20856	YMR270C	BY4743	13_5	206	A	5		0	+	0	0	+	+	+	+
20858	YMR272C	BY4743	13_5	206	A	7		0	+	+	+	+	+	+	0
20859	YMR273C	BY4743	13_5	206	A	8		+	+	0	0	++	++	+	++
20860	YMR274C	BY4743	13_5	206	A	9		0	0	+	+	+	+	+	+
20861	YMR275C	BY4743	13_5	206	A	10		+	0	+	+	+	+	+	+
20862	YMR276W	BY4743	13_5	206	A	11		0	+	+	+	+	+	0	+
20863	YMR277W	BY4743	13_5	206	A	12		+	+	+	+	+	+	++	++
20864	YMR278W	BY4743	13_5	206	B	1		+	+	+	0	+	++	+	+
20866	YMR280C	BY4743	13_5	206	B	2		+	+	0	+	+	+	+	+
20867	YMR281W	BY4743	13_5	206	B	3		0	0	+	+	0	+	+	+
20868	YMR282C	BY4743	13_5	206	B	4		+	0	+	0	+	0	+	+
20869	YMR283C	BY4743	13_5	206	B	5		+	0	+	+	+++	++	++	+
20870	YMR284W	BY4743	13_5	206	B	6		0	0	0	0	+	+	+	+
20871	YMR285C	BY4743	13_5	206	B	7		0	+	0	0	+	+	+	+
20872	YMR286W	BY4743	13_5	206	B	8		0	0	+	+	+	+	+	+
20873	YMR287C	BY4743	13_5	206	B	9		0	+	+	+	+	+	+	+
20874	YMR288W	BY4743	13_5	206	B	10		0	0	+	+	++	++	+	++
20875	YMR289W	BY4743	13_5	206	B	11		0	0	+	+	+++	+++	+++	+++
20876	YMR290W-A	BY4743	13_5	206	B	12		+	+	+	+	+	+	++	+
20877	YMR290C	BY4743	13_5	206	C	1		+	+	+	+	+	0	+	+
20878	YMR291W	BY4743	13_5	206	C	2		+	0	+	0	+	+	+	+
20879	YMR292W	BY4743	13_5	206	C	3		+	+	+	+	+	+	+	+
20880	YMR293C	BY4743	13_5	206	C	4		+	0	+	+	++	++	+++	+++
20881	YMR294W	BY4743	13_5	206	C	5		0	0	+	0	0	0	+	+
20882	YMR294W-A	BY4743	13_5	206	C	6		+	0	+	0	0	+	+	+
20883	YMR295C	BY4743	13_5	206	C	7		+	+	+	+	+	+	+	+
20884	YMR296C	BY4743	13_5	206	C	8		0	0	+	+	+	+	+	+
20885	YMR297W	BY4743	13_5	206	C	9		+	0	+	+	+	+	+	+
20886	YMR298W	BY4743	13_5	206	C	10		0	0	+	+	+	+	+	+
20887	YMR299C	BY4743	13_5	206	C	11		0	+	+	0	+	+	+	+
20888	YMR300C	BY4743	13_5	206	C	12		+	0	0	0	+++	++++	++++	+++
20889	YMR301C	BY4743	13_5	206	D	1		+	+	+	0	+	0	+	+
20890	YMR302C	BY4743	13_5	206	D	2		0	0	0	+	+	+	+	+
20891	YMR303C	BY4743	13_5	206	D	3		0	0	0	0	+	+	+	+
20892	YMR304W	BY4743	13_5	206	D	4		0	0	0	0	+	+	+	+
20893	YMR304C-A	BY4743	13_5	206	D	5		+	0	+	0	+	0	+	+
20894	YMR305C	BY4743	13_5	206	D	6		+	+	+	+	+	0	+	0
20896	YMR306C-A	BY4743	13_5	206	D	7		0	+	+	+	+	0	+	+
20897	YMR307W	BY4743	13_5	206	D	8		+	+	+	0	+++	++++	++++	++++
20898	YMR308C	BY4743	13_5	206	D	9		+	0	+	0	++	+++	++	++
20899	YMR309C	BY4743	13_5	206	D	10		+	+	+	+	++	+++	++	+++
20900	YMR310C	BY4743	13_5	206	D	11		+	+	+	+	+	+	+	+
21105	YNL339C	BY4743	14_1	206	D	12		0	0	0	+	+	+	+	+
21106	YNL338W	BY4743	14_1	206	E	1		+	0	+	+	+	0	+	+
21108	YNL336W	BY4743	14_1	206	E	2		0	+	+	+	+++	++	+++	++++
21109	YNL335W	BY4743	14_1	206	E	3		+	0	+	+	0	+	++	+
21110	YNL334C	BY4743	14_1	206	E	4		+	0	+	0	+	0	+	+
21111	YNL333W	BY4743	14_1	206	E	5		+	+	0	+	0	0	0	+
21112	YNL332W	BY4743	14_1	206	E	6		+	0	+	+	+	++	+++	++
21114	YNL330C	BY4743	14_1	206	E	7		0	+	+	+	+	+	+	++
21115	YNL329C	BY4743	14_1	206	E	8		0	0	+	+	+	+	++	+
21116	YNL328C	BY4743	14_1	206	E	9		0	0	+	+	+	+	+	+
21117	YNL327W	BY4743	14_1	206	E	10		0	0	0	+	++	+	+	+
21118	YNL326C	BY4743	14_1	206	E	11		0	0	0	+	++++	++	+++	+++
21119	YNL324W	BY4743	14_1	206	E	12		0	+	+	+	++	++	+++	++
21120	YNL325C	BY4743	14_1	206	F	1		0	+	0	+	+	+	+	+
21121	YNL323W	BY4743	14_1	206	F	2		+	+	0	+	+	0	+	+
21122	YNL322C	BY4743	14_1	206	F	3		+	+	0	0	+	+	++	++
21123	YNL321W	BY4743	14_1	206	F	4		0	0	0	+	+	+	++	+
21124	YNL320W	BY4743	14_1	206	F	5		+	0	+	0	+	+	+	+
21125	YNL319W	BY4743	14_1	206	F	6		+	0	+	0	0	+	+	+
21126	YNL318C	BY4743	14_1	206	F	7		+	+	+	+	+	+	++	+
21127	YNL317W	BY4743	14_1	206	F	8		0	0	+	+	+++	++++	+++	+++
21130	YNL314W	BY4743	14_1	206	F	9		0	0	+	0	+	+	+	+
21131	YNL313C	BY4743	14_1	206	F	10		+	+	+	0	+	+	+	+
21132	YNL312W	BY4743	14_1	206	F	11		+	+	+	+	+	+	+	+
21133	YNL311C	BY4743	14_1	206	F	12		0	0	0	+	++	+	+	+
21134	YNL310C	BY4743	14_1	206	G	1		0	0	0	0	+	+	+	+
21136	YNL308C	BY4743	14_1	206	G	2		+	+	+	+	+	+	+	+
21137	YNL307C	BY4743	14_1	206	G	3		0	+	+	0	++	+++	++	+++
21138	YNL306W	BY4743	14_1	206	G	4		+	0	+	0	+	+	+	+
21139	YNL305C	BY4743	14_1	206	G	5		0	0	+	+	0	+	+	+
21140	YNL304W	BY4743	14_1	206	G	6		0	0	+	+	0	0	+	+
21141	YNL303W	BY4743	14_1	206	G	7		+	+	+	+	+	+	+	++
21142	YNL302C	BY4743	14_1	206	G	8		0	+	+	+	+++	++	+++	+++
21143	YNL301C	BY4743	14_1	206	G	9		0	0	0	+	+	+	+	+
21145	YNL299W	BY4743	14_1	206	G	10		+	0	+	0	+	+	+	+
21146	YNL298W	BY4743	14_1	206	G	11	Incorrect. Correct strain can be found in plate 264	ND°	ND°	ND°	ND°	ND°	ND°	ND°	ND°
21147	YNL296W	BY4743	14_1	206	G	12		+	0	+	+	+	+	+	++
21148	YNL297C	BY4743	14_1	206	H	1		0	0	+	+	+	+	++	++
21149	YNL295W	BY4743	14_1	206	H	2		+	+	+	+	+	+	+	+
21150	YNL294C	BY4743	14_1	206	H	3		0	+	+	+	+	+	++	++
21151	YNL293W	BY4743	14_1	206	H	5		0	+	+	+	++	++	+++	+++
21152	YNL292W	BY4743	14_1	206	H	6		+	+	+	+	+	+	+	++
21153	YNL291C	BY4743	14_1	206	H	7		+	+	+	+	+	+	+	+
21154	YNL290W	BY4743	14_1	206	H	8		+	+	+	+	+	+	+	+
21155	YNL289W	BY4743	14_1	206	H	9		0	0	+	0	+	+	+	+
21156	YNL288W	BY4743	14_1	206	H	10		+	+	+	+	+	++	+	+
21158	YNL286W	BY4743	14_1	206	H	11		++	++	+	+	+	+	+	+
21159	YNL285W	BY4743	14_1	206	H	12		0	0	+	+	+	+	++	+
21161	YNL283C	BY4743	14_1	207	A	1		0	0	+	+	0	+	+	+
21162	YNL282W	BY4743	14_1	207	A	2		0	0	+	0	0	+	+	+
21163	YNL281W	BY4743	14_1	207	A	3		0	0	0	0	+	+	0	++
21164	YNL280C	BY4743	14_1	207	A	4		0	0	+	+	+	+	++	++
21166	YNL278W	BY4743	14_1	207	A	5		0	0	+	0	+	+	+	+
21167	YNL277W	BY4743	14_1	207	A	6	Incorrect. Correct strain can be found in plate 264	ND°	ND°	ND°	ND°	ND°	ND°	ND°	ND°
21168	YNL276C	BY4743	14_1	207	A	8	Incorrect. Correct strain can be found in plate 264	ND°	ND°	ND°	ND°	ND°	ND°	ND°	ND°
21169	YNL275W	BY4743	14_1	207	A	9		0	0	0	0	++	+++	++	+++
21171	YNL273W	BY4743	14_1	207	A	10		+	+	0	0	+	+	+	+
21172	YNL272C	BY4743	14_1	207	A	11		0	0	0	0	+	+	+	+
21173	YNL271C	BY4743	14_1	207	A	12		0	+	+	+	++	++	+++	+++
21174	YNL270C	BY4743	14_1	207	B	1		0	+	+	0	++	+	+++	+++
21175	YNL269W	BY4743	14_1	207	B	2		0	+	+	0	+	++	+	+
21176	YNL268W	BY4743	14_1	207	B	3		0	0	+	+	+	+	+	+
21178	YNL266W	BY4743	14_1	207	B	4		0	0	+	0	+	0	+	+
21179	YNL265C	BY4743	14_1	207	B	5		0	0	+	+	+++	++	++++	+
21180	YNL264C	BY4743	14_1	207	B	6		0	0	0	+	0	+	+	+++
21181	YNL263C	BY4743	14_1	207	B	7		0	+	0	+	+	+	+	+
21183	YNL261W	BY4743	14_1	207	B	8		0	+	0	0	+	+	+	++
21185	YNL259C	BY4743	14_1	207	B	9		+	+	+	+	+	++	++	++
21186	YNL258C	BY4743	14_1	207	B	10		0	0	+	+	+	+	+	+
21187	YNL257C	BY4743	14_1	207	B	11		+	0	0	+	+	+	++	++
21189	YNL255C	BY4743	14_1	207	B	12		0	+	0	+	+	+	0	+
21190	YNL254C	BY4743	14_1	207	C	1		0	+	+	0	+++	++++	++++	++++
21191	YNL253W	BY4743	14_1	207	C	2		0	0	0	+	+	+	+	+
21195	YNL249C	BY4743	14_1	207	C	3		0	0	0	+	0	+	+	+
21196	YNL248C	BY4743	14_1	207	C	4		0	+	+	+	+	+	+	+
21197	YNL247W	BY4743	14_1	207	C	5		0	0	+	0	0	+	+	+
21198	YNL246W	BY4743	14_1	207	C	6		0	0	0	0	+	+	++	++
21199	YNL245C	BY4743	14_1	207	C	7	slow gowth on auxotrophy plate	0	0	0	0	0	+	0	+
21777	YOR001W	BY4743	15_1	207	C	8		0	+	0	0	++	+++	+++	++++
21778	YOR002W	BY4743	15_1	207	C	9		0	0	+	0	+	+	+	++
21779	YOR003W	BY4743	15_1	207	C	10		0	0	0	0	+	+	+	+
21781	YOR005C	BY4743	15_1	207	C	11		0	+	0	0	+	+	+	++
21782	YOR006C	BY4743	15_1	207	C	12		0	0	0	0	+	+	+	+
21783	YOR007C	BY4743	15_1	207	D	1		0	0	+	0	+	+	+	++
21785	YOR009W	BY4743	15_1	207	D	2		0	0	0	0	+	0	+	++
21786	YOR010C	BY4743	15_1	207	D	3		0	0	0	+	+	+	+	+
21787	YOR011W	BY4743	15_1	207	D	4		0	0	0	0	+	+	+	+
21788	YOR012W	BY4743	15_1	207	D	5		0	0	+	0	+	+	+	+
21789	YOR013W	BY4743	15_1	207	D	6		+	0	+	0	+	+	+	+
21791	YOR015W	BY4743	15_1	207	D	7		0	0	+	+	+	++	+	+
21792	YOR016C	BY4743	15_1	207	D	8		0	+	0	0	+	++	+	++
21793	YOR017W	BY4743	15_1	207	D	9		0	+	0	+	+	+	+	++
21794	YOR018W	BY4743	15_1	207	D	10		0	+	0	+	+	+	+	+
21795	YOR019W	BY4743	15_1	207	D	11		0	+	+	0	+	+	+	+
21797	YOR021C	BY4743	15_1	207	D	12		0	0	+	+	+	+	+	+
21798	YOR022C	BY4743	15_1	207	E	1		0	0	+	0	+	+	+	+
21799	YOR023C	BY4743	15_1	207	E	2		0	0	0	+	++	++	+++	++
21800	YOR024W	BY4743	15_1	207	E	3		0	0	0	+	+	+	+	+
21801	YOR025W	BY4743	15_1	207	E	4		0	0	+	0	+	+	+	+
21802	YOR026W	BY4743	15_1	207	E	5		0	0	0	+	0	+	0	+
21803	YOR027W	BY4743	15_1	207	E	6		0	+	0	+	+	+	++	++
21804	YOR028C	BY4743	15_1	207	E	7		0	0	0	0	+	+	0	+
21805	YOR029W	BY4743	15_1	207	E	8		0	0	+	0	+	+	+	+
21806	YOR030W	BY4743	15_1	207	E	9		+	+	0	0	+	+	+	+
21807	YOR031W	BY4743	15_1	207	E	10		0	+	+	+	+	+	+	+
21808	YOR032C	BY4743	15_1	207	E	11		+	+	+	+	+	0	+	+
21809	YOR033C	BY4743	15_1	207	E	12		0	+	0	0	+	+	+	+
21810	YOR034C	BY4743	15_1	207	F	1		0	0	0	0	+	0	+	+
21811	YOR035C	BY4743	15_1	207	F	2		0	0	0	+	+++	+++	+++	+++
21812	YOR036W	BY4743	15_1	207	F	3		0	0	0	+	+	+	+	+
21813	YOR037W	BY4743	15_1	207	F	4		0	0	+	0	+	+	++	++
21814	YOR038C	BY4743	15_1	207	F	5		0	+	0	+	+	+	+	+
21815	YOR039W	BY4743	15_1	207	F	6	no growth on auxotrophy plate	0	0	0	0	+	+	+	+
21816	YOR040W	BY4743	15_1	207	F	7		0	+	0	+	+	0	+	+
21817	YOR041C	BY4743	15_1	207	F	8		+	0	+	+	+	+	+	+
21818	YOR042W	BY4743	15_1	207	F	9		0	+	0	+	++	++	+++	+++
21819	YOR043W	BY4743	15_1	207	F	10		0	+	+	0	+	+	+	+
21820	YOR044W	BY4743	15_1	207	F	11		0	0	+	0	++	++	++	++
21821	YOR045W	BY4743	15_1	207	F	12		0	0	0	+	+++	++++	++++	++++
21823	YOR047C	BY4743	15_1	207	G	1		0	+	+	0	+	+	+	+
21825	YOR049C	BY4743	15_1	207	G	2		0	0	0	0	+	++	+	+
21826	YOR050C	BY4743	15_1	207	G	3		0	0	0	+	+	+	+	+
21827	YOR051C	BY4743	15_1	207	G	4		0	+	0	+	0	+	+	+
21828	YOR052C	BY4743	15_1	207	G	5		+	+	+	0	+	+	++	++
21829	YOR053W	BY4743	15_1	207	G	6		0	+	+	+	+	+	+	+
21830	YOR054C	BY4743	15_1	207	G	7		0	0	0	+	+	+	+	+
21831	YOR055W	BY4743	15_1	207	G	8		0	+	0	0	++	++	++	+++
21834	YOR058C	BY4743	15_1	207	G	9		+	0	+	+	+	0	+	+
21835	YOR059C	BY4743	15_1	207	G	10		0	0	0	+	+	+	+	+
21837	YOR061W	BY4743	15_1	207	G	11	no growth on auxotrophy plate	0	+	0	0	+	+	+	+
21838	YOR062C	BY4743	15_1	207	G	12		0	+	+	0	+	+	+	++
21840	YOR064C	BY4743	15_1	207	H	1		+	0	+	+	+	+	+	+
21841	YOR065W	BY4743	15_1	207	H	2		0	0	+	+	+	+	+	+
21842	YOR066W	BY4743	15_1	207	H	3		0	0	0	+	0	+	+	+
21843	YOR067C	BY4743	15_1	207	H	5		+	0	0	0	+	+	+	+
21844	YOR068C	BY4743	15_1	207	H	6		0	0	0	+	+	+	+	+
21845	YOR069W	BY4743	15_1	207	H	7		0	+	0	0	+	++	+	+
21846	YOR070C	BY4743	15_1	207	H	8		0	+	+	+	++	+++	++	+++
21847	YOR071C	BY4743	15_1	207	H	9		0	+	+	+	+	+	+	+
21848	YOR072W	BY4743	15_1	207	H	10		0	0	0	+	++++	++++	++++	++++
21849	YOR073W	BY4743	15_1	207	H	11		0	+	+	0	++++	+++	++++	++++
21852	YOR076C	BY4743	15_1	207	H	12		0	+	0	+	+	+	+	+
21855	YOR079C	BY4743	15_1	208	A	1		0	0	0	+	++	+	+	+
21856	YOR080W	BY4743	15_1	208	A	2		+	0	0	+	+	+	+	+
21857	YOR081C	BY4743	15_1	208	A	3		0	0	0	+	++	++	++	++
21858	YOR082C	BY4743	15_1	208	A	4		0	0	0	+	+	+	+	+
21859	YOR083W	BY4743	15_1	208	A	5		+	0	+	0	++	+	++++	+++
21860	YOR084W	BY4743	15_1	208	A	6		+	0	0	+	+	+	+	+
21861	YOR085W	BY4743	15_1	208	A	7		+	0	0	0	+	+	+	+
21862	YOR086C	BY4743	15_1	208	A	9		+	0	0	0	+	+	+	+
21863	YOR087W	BY4743	15_1	208	A	10		+	+	0	+	+	+	+	+
21864	YOR088W	BY4743	15_1	208	A	11		+	0	0	+	+	+	+	+
21866	YOR090C	BY4743	15_1	208	A	12		+	0	+	+	+	+	++	+
21867	YOR091W	BY4743	15_1	208	B	1		+	0	0	0	++	++	++	++
21868	YOR092W	BY4743	15_1	208	B	2		0	0	0	+	+	+	+	+
21870	YOR094W	BY4743	15_1	208	B	3		+	+	+	+	+	+	+	+
21586	YOR290C	BY4743	15_4	208	B	4		+	+	0	+	+	+	+	+
21587	YOR291W	BY4743	15_4	208	B	5		0	0	+	+	+	+	+	+
21589	YOR293W	BY4743	15_4	208	B	6		0	+	+	0	++	+	+	+
21590	YOR294W	BY4743	15_4	208	B	7		0	+	0	0	+	+	+	+
21591	YOR295W	BY4743	15_4	208	B	8		0	0	0	0	+++	++++	++++	++++
21592	YOR296W	BY4743	15_4	208	B	9		+	0	+	+	+++	+++	+	+
21594	YOR298W	BY4743	15_4	208	B	10		+	0	+	+	+++	++++	++++	++++
21595	YOR299W	BY4743	15_4	208	B	11		+	0	0	+	+	+	+	+
21597	YOR301W	BY4743	15_4	208	B	12		0	+	+	+	+	+	+	+
21598	YOR302W	BY4743	15_4	208	C	1		+	0	+	+	+	++	++	++
21599	YOR303W	BY4743	15_4	208	C	2		+	0	+	+	+	+	+	+
21600	YOR304C-A	BY4743	15_4	208	C	3		+	+	+	+	+	++	++	+++
21601	YOR304W	BY4743	15_4	208	C	4		+	+	0	+	+	++	++	++
21602	YOR305W	BY4743	15_4	208	C	5		+	0	0	+	+	+	+	++
21604	YOR307C	BY4743	15_4	208	C	6		+	0	+	+	++	+	++	++
21605	YOR308C	BY4743	15_4	208	C	7		+	+	+	0	+	+	+	+
21608	YOR311C	BY4743	15_4	208	C	8		0	+	0	+	+	+	+	++
21609	YOR312C	BY4743	15_4	208	C	9		0	0	+	+	++	++	+	+
21610	YOR313C	BY4743	15_4	208	C	10		+	0	0	+	++	++	+	+
21611	YOR314W	BY4743	15_4	208	C	11		+	+	0	+	+	+	+	+
21612	YOR315W	BY4743	15_4	208	C	12		0	0	0	0	+	0	+	+
21616	YOR319W	BY4743	15_4	208	D	1		+	+	+	+	+	+	++	++
21617	YOR320C	BY4743	15_4	208	D	2		0	+	0	+	+	+	+++	+++
21618	YOR321W	BY4743	15_4	208	D	3		0	+	0	+	+	+	+	+
21619	YOR322C	BY4743	15_4	208	D	4		0	+	0	0	+	+	++	+
21620	YOR323C	BY4743	15_4	208	D	5		0	0	+	+	+	+	+	+
21621	YOR324C	BY4743	15_4	208	D	6		0	+	+	+	+	+	++	++
21623	YOR326W	BY4743	15_4	208	D	7		+	0	+	+	++	+	+	+
21624	YOR327C	BY4743	15_4	208	D	8		0	0	0	+	+	+	+	+
21625	YOR328W	BY4743	15_4	208	D	9		0	+	+	0	++	++	+	+
21626	YOR329C	BY4743	15_4	208	D	10		0	0	+	0	++	++	+	+
21627	YOR330C	BY4743	15_4	208	D	11		+	+	+	+	+	+	+	+
21629	YOR332W	BY4743	15_4	208	D	12		+	+	+	+	+	+	+	+
21631	YOR334W	BY4743	15_4	208	E	1	very slow growth on auxotrophy plates	0	+	+	0	++	+	+	+
21632	YOR335C	BY4743	15_4	208	E	2		0	+	0	+	++	++	+++	++++
21633	YOR336W	BY4743	15_4	208	E	3		0	+	0	+	++	++	+	0
21634	YOR337W	BY4743	15_4	208	E	4		0	0	+	+	+	+	+	++
21636	YOR339C	BY4743	15_4	208	E	5		0	0	+	+	+	+	+	+
21637	YOR340C	BY4743	15_4	208	E	6		+	+	+	+	++	+	+	+
21638	YOR341W	BY4743	15_4	208	E	7		+	0	0	+	++	++	++	+++
21639	YOR342C	BY4743	15_4	208	E	8		+	0	+	+	+	++	++	++
21640	YOR343C	BY4743	15_4	208	E	9		+	+	+	+	++	+	+	+
21643	YOR346W	BY4743	15_4	208	E	10		+	+	+	+	+	+	+	+
21644	YOR347C	BY4743	15_4	208	E	11		0	0	+	+	+	+	+	+
21645	YOR348C	BY4743	15_4	208	E	12		+	+	+	+	++	++	++	++
21646	YOR349W	BY4743	15_4	208	F	1		0	+	+	+	+	+	++	+
21647	YOR350C	BY4743	15_4	208	F	2		+	0	0	+	+	++	++	++
21648	YOR351C	BY4743	15_4	208	F	3		0	0	0	+	++	++	++	++
21649	YOR352W	BY4743	15_4	208	F	4		0	+	+	+	+	++	+++	+
21650	YOR353C	BY4743	15_4	208	F	5		+	+	+	0	+	+	++	+
21651	YOR354C	BY4743	15_4	208	F	6		+	+	+	0	+	++	++	+
21652	YOR355W	BY4743	15_4	208	F	7		0	0	+	+	++	++	++	++
21653	YOR356W	BY4743	15_4	208	F	8		+	+	+	+	+	+	+	+
21654	YOR357C	BY4743	15_4	208	F	9		+	+	+	+	+	+	+	+
21655	YOR358W	BY4743	15_4	208	F	10		+	0	0	+	+	+	+	+
21656	YOR359W	BY4743	15_4	208	F	11		+	+	+	+	+	+	+	+
21657	YOR360C	BY4743	15_4	208	F	12		+	+	0	+	++	+	+	+
21658	YOR361C	BY4743	15_4	208	G	1		+	+	+	+	+	+	+	+
21659	YOR362C	BY4743	15_4	208	G	2		+	+	+	0	++	++	++	++++
21660	YOR363C	BY4743	15_4	208	G	3		+	+	+	+	+	+	++	+
21662	YOR365C	BY4743	15_4	208	G	4		+	0	+	+	+	+	+	++
21664	YOR367W	BY4743	15_4	208	G	5		0	+	+	+	+	+	+	+
21665	YOR368W	BY4743	15_4	208	G	6		0	0	+	0	+	+	+	+
21666	YOR369C	BY4743	15_4	208	G	7		0	0	+	0	+	+	+	++
21667	YOR370C	BY4743	15_4	208	G	8		0	0	+	+	++	++	+++	+++
21668	YOR371C	BY4743	15_4	208	G	9		0	0	0	+	++	++	+	+
21669	YOR372C	BY4743	15_4	208	G	10		+	+	+	+	++	++	+	+
21670	YOR373W	BY4743	15_4	208	G	11		+	+	+	+	+	+	+	+
21671	YOR374W	BY4743	15_4	208	G	12		+	+	+	+	+	+	+	+
21672	YOR375C	BY4743	15_4	208	H	1		+	+	+	+	+	+	+	+
21673	YOR376W	BY4743	15_4	208	H	2		+	+	+	0	+	+	+	+
21674	YOR377W	BY4743	15_4	208	H	3		+	+	0	+	+	++	++	++
21675	YOR378W	BY4743	15_4	208	H	5		0	+	0	+	++	++	+	++++
21677	YOR380W	BY4743	15_4	208	H	6		0	0	+	+	+	+	+	+
21678	YOR381W	BY4743	15_4	208	H	7		++	++	++	++	+	0	+	+
21679	YOR382W	BY4743	15_4	208	H	8		0	0	+	+	+	++	0	+
21680	YOR383C	BY4743	15_4	208	H	9		0	0	+	0	+	+	+	+
21681	YOR384W	BY4743	15_5	208	H	10		0	+	0	+	+++	+++	++++	++++
21682	YOR385W	BY4743	15_5	208	H	11		+	0	+	+	+	+	+	+
21692	YOL001W	BY4743	15_5	208	H	12		+	+	+	+	+	+	+	+
21693	YOL002C	BY4743	15_5	209	A	1		+	+	+	+	0	0	+	+
21694	YOL003C	BY4743	15_5	209	A	2		+	+	+	+	+	0	+	+
21695	YOL004W	BY4743	15_5	209	A	3		+	+	+	+	+	+	+++	++
21696	YOL005C	BY4743	15_5	209	A	4		+	+	+	+	0	+	+	+
21697	YOL006C	BY4743	15_5	209	A	5		+	+	+	+	0	+	+	+
21698	YOL007C	BY4743	15_5	209	A	6		+	+	+	+	+	+	+	+
21699	YOL008W	BY4743	15_5	209	A	7		+	+	0	+	+	++	++	+
21700	YOL009C	BY4743	15_5	209	A	8		+	+	+	+	+	+	+	+
21701	YOL010W	BY4743	15_5	209	A	10		+	0	+	+	+	+	++	+
21702	YOL011W	BY4743	15_5	209	A	11		+	0	+	+	+++	++	+++	++++
21703	YOL012C	BY4743	15_5	209	A	12		+	+	+	+	+	+	+	+
21704	YOL013C	BY4743	15_5	209	B	1		+	+	+	+	0	+	++	++
21705	YOL014W	BY4743	15_5	209	B	2		+	0	+	0	0	+	+	+
21706	YOL015W	BY4743	15_5	209	B	3		+	0	+	+	+	+	++	+
21708	YOL017W	BY4743	15_5	209	B	4		+	+	+	+	0	0	+	+
21710	YOL019W	BY4743	15_5	209	B	5		+	+	+	+	0	0	+	+
21711	YOL020W	BY4743	15_5	209	B	6		+	+	+	+	0	+	+	+
21712	YOL021C	BY4743	15_5	209	B	7		+	+	+	+	+	+	+	+
21713	YOL022C	BY4743	15_5	209	B	8		0	+	+	+	+	+	++	+
21714	YOL023W	BY4743	15_5	209	B	9		+	+	0	+	+	+	+	+
21715	YOL024W	BY4743	15_5	209	B	10		+	+	+	+	+	+	++	+
21716	YOL025W	BY4743	15_5	209	B	11		+	+	+	0	+	++	+++	+++
21717	YOL026C	BY4743	15_5	209	B	12		+	+	+	+	+	+	+	+
21718	YOL027C	BY4743	15_5	209	C	1		+	+	+	+	0	0	+	+
21719	YOL028C	BY4743	15_5	209	C	2		+	+	+	+	+	0	++	+
21720	YOL029C	BY4743	15_5	209	C	3		+	+	+	0	++++	++	++++	++++
21721	YOL030W	BY4743	15_5	209	C	4	very slow growth on auxotrophy plate	+	+	+	+	0	+	++	+
21722	YOL031C	BY4743	15_5	209	C	5	very slow growth on auxotrophy plate	+	0	+	+	0	+	+	+
21723	YOL032W	BY4743	15_5	209	C	6		+	+	+	+	+	0	+	+
21724	YOL033W	BY4743	15_5	209	C	7		+	+	+	+	+	0	+	+
21725	YOL034W	BY4743	15_5	209	C	8		0	0	+	+	+	+	+	+
21726	YOL035C	BY4743	15_5	209	C	9		+	+	+	+	++	+++	++++	++++
21727	YOL036W	BY4743	15_5	209	C	10		+	+	0	+	+	0	+	+
21728	YOL037C	BY4743	15_5	209	C	11		+	+	+	+	+	+	++	++
21729	YOL038W	BY4743	15_5	209	C	12		+	+	+	+	0	0	++	+
21730	YOL039W	BY4743	15_5	209	D	1		+	+	+	+	+	+	++	+
21731	YOL040C	BY4743	15_5	209	D	2		+	+	+	+	+	+	+	+
21732	YOL041C	BY4743	15_5	209	D	3		+	+	+	+	+	+	+	+
21733	YOL042W	BY4743	15_5	209	D	4		+	+	+	+	0	+	+	+
21734	YOL043C	BY4743	15_5	209	D	5		+	+	+	+	0	+	++	+
21735	YOL044W	BY4743	15_5	209	D	6		++	+++	++	++	0	0	+	+
21736	YOL045W	BY4743	15_5	209	D	7		+	+	0	+	+	+	+	+
21737	YOL046C	BY4743	15_5	209	D	8		+	+	0	0	0	0	+	+
21738	YOL047C	BY4743	15_5	209	D	9		+	+	0	+	0	+	+	+
21739	YOL048C	BY4743	15_5	209	D	10		+	+	+	+	+	+	+	+
21740	YOL049W	BY4743	15_5	209	D	11		+	0	+	+	++	++	++++	++++
21741	YOL050C	BY4743	15_5	209	D	12		+	+	0	0	+	+	+
21742	YOL051W	BY4743	15_5	209	E	1		+	+	+	0	0	+	+	+
21743	YOL052C	BY4743	15_5	209	E	2		0	0	+	0	+	0	+	+
21744	YOL053C-A	BY4743	15_5	209	E	3		+	0	+	0	+	+	++	+
21745	YOL053W	BY4743	15_5	209	E	4		+	+	+	+	0	+	+	+
21746	YOL054W	BY4743	15_5	209	E	5		+	+	+	+	+	+	+	+
21747	YOL055C	BY4743	15_5	209	E	6		0	+	+	+	+	+	0	+
21748	YOL056W	BY4743	15_5	209	E	7		+	0	+	+	+	+	+	+
21749	YOL057W	BY4743	15_5	209	E	8		+	+	+	+	0	+	+	+
21750	YOL058W	BY4743	15_5	209	E	9		0	+	+	0	++	+++	++++	++++
21751	YOL059W	BY4743	15_5	209	E	10		+	+	+	0	++	+	+++	+
21752	YOL060C	BY4743	15_5	209	E	11		+	+	+	+	+	+	+	+
21753	YOL061W	BY4743	15_5	209	E	12		+	+	+	+	+	+	+	+
21754	YOL062C	BY4743	15_5	209	F	1		+	+	+	+	+	+	+	+
21755	YOL063C	BY4743	15_5	209	F	2		+	+	+	0	+	0	+	+
21756	YOL064C	BY4743	15_5	209	F	3		+	+	0	+	+	0	+	+
21757	YOL065C	BY4743	15_5	209	F	4		+	0	+	+	+	+	+	+
21758	YOL066C	BY4743	15_5	209	F	5		+	+	+	+	0	+	+	+
21759	YOL067C	BY4743	15_5	209	F	6		0	+	+	+	++	+++	++++	++++
21760	YOL068C	BY4743	15_5	209	F	7		0	+	+	+	+	+	++	+
21761	YOL069W	BY4743	15_5	209	F	8		+	+	+	+	+	+	+	+
21762	YOL070C	BY4743	15_5	209	F	9		+	0	+	+	0	+	+	+
21763	YOL071W	BY4743	15_5	209	F	10		+	+	+	0	+	+	++	+
21764	YOL072W	BY4743	15_5	209	F	11		+	+	0	+	+	+	+	+
21766	YOL075C	BY4743	15_5	209	F	12		0	+	+	0	0	+	+	+
21767	YOL076W	BY4743	15_5	209	G	1		+	+	+	+	+	+	++	+
21768	YOL077C	BY4743	15_5	209	G	2		+	+	+	+	+	0	+	0
21770	YOL079W	BY4743	15_5	209	G	3		+	+	+	+	+	+	++	++
21771	YOL080C	BY4743	15_5	209	G	4		+	+	+	+	+	+	+	+
21772	YOL081W	BY4743	15_5	209	G	5		+++	++++	+++	+++	+	0	+	0
21773	YOL082W	BY4743	15_5	209	G	6		+	+	+	0	+	+	+	+
21774	YOL083W	BY4743	15_5	209	G	7		+	+	+	+	+	+	+	+
21775	YOL084W	BY4743	15_5	209	G	8		+	0	+	+	+	+	+	+
21776	YOL085C	BY4743	15_5	209	G	9		0	0	+	+	+	0	+	++
21018	YPL274W	BY4743	16_1	209	G	10		0	+	+	+	+	+	+	+
21019	YPL273W	BY4743	16_1	209	G	11		++++	++++	++++	++++	0	0	+	+
21021	YPL271W	BY4743	16_1	209	G	12		+	+	+	+	++	+	++	++
21022	YPL270W	BY4743	16_1	209	H	1		+	+	+	+	+	+	+	+
21023	YPL269W	BY4743	16_1	209	H	2		+	+	0	+	++	++	+++	++
21025	YPL267W	BY4743	16_1	209	H	3		+	+	+	+	+	+	++	+++
21026	YPL266W	BY4743	16_1	209	H	5		+	+	+	+	+	+	+	+
21027	YPL265W	BY4743	16_1	209	H	6	very slow growth on auxotrophy plate	+	+	+	+	+	+	+	+
21028	YPL264C	BY4743	16_1	209	H	7		+	+	+	+	+	+	+	+
21029	YPL263C	BY4743	16_1	209	H	8	very slow growth on auxotrophy plate	0	+	+	+	+	+	+	++
21030	YPL262W	BY4743	16_1	209	H	9		++	+	+	+	++	++	++++	+++
21031	YPL260W	BY4743	16_1	209	H	10		+	+	+	+	+	0	+	+
21032	YPL261C	BY4743	16_1	209	H	11		+	+	+	+	+	+	+	+
21033	YPL259C	BY4743	16_1	209	H	12		+	+	+	+	+	+	+	+
21034	YPL258C	BY4743	16_1	210	A	1		+	0	+	+	++	+	+	+
21035	YPL257W	BY4743	16_1	210	A	2		+	+	+	+	++	+	++	+
21036	YPL256C	BY4743	16_1	210	A	3		0	+	+	+	+	+	+	+
21037	YPL255W	BY4743	16_1	210	A	4		0	+	+	+	+	+	+	+
21038	YPL254W	BY4743	16_1	210	A	5	very slow growth on auxotrophy plate	+	+	+	+	+	+	+	+
21039	YPL253C	BY4743	16_1	210	A	6		0	0	+	+	+	+	+	+
21040	YPL251W	BY4743	16_1	210	A	7		+	0	+	+	+	++	+	+
21041	YPL252C	BY4743	16_1	210	A	8		+	+	+	+	+	+	+	+
21042	YPL250C	BY4743	16_1	210	A	9		0	0	+	+	+	+	+	+
21043	YPL249C	BY4743	16_1	210	A	11		+	0	+	+	++	++	++	+
21044	YPL248C	BY4743	16_1	210	A	12		0	+	+	+	+	+	+	+
21045	YPL247C	BY4743	16_1	210	B	1		0	0	+	+	+	+	+	+
21046	YPL246C	BY4743	16_1	210	B	2		0	0	+	+	+	+	+	+
21047	YPL245W	BY4743	16_1	210	B	3		0	+	+	+	+	+	+	++
21048	YPL244C	BY4743	16_1	210	B	4		0	0	+	0	0	0	+	+
21049	YPL243W	BY4743	16_1	210	B	5		0	+	+	+	+	+	+	+
21050	YPL242C	BY4743	16_1	210	B	6		0	0	+	+	+++	++	++	++
21051	YPL241C	BY4743	16_1	210	B	7		+	+	0	+	+	+	+	+
21052	YPL240C	BY4743	16_1	210	B	8		0	+	0	+	+	+	+	+
21053	YPL239W	BY4743	16_1	210	B	9		0	+	+	+	++	+	+	++
21054	YPL237W	BY4743	16_1	210	B	10		0	+	+	+	+	+	+	+
21055	YPL238C	BY4743	16_1	210	B	11		+	+	+	+	+	+	+	+
21056	YPL236C	BY4743	16_1	210	B	12		0	0	+	+	+	+	+	++
21057	YPL235W	BY4743	16_1	210	C	1		+	0	+	+	++	+	+	+
21058	YPL234C	BY4743	16_1	210	C	2	very slow growth on auxotrophy plate	0	0	0	+	+	+	++	++
21059	YPL233W	BY4743	16_1	210	C	3		0	0	+	+	0	0	0	+
21060	YPL232W	BY4743	16_1	210	C	4		+	+	+	+	+	+	+	+
21061	YPL231W	BY4743	16_1	210	C	5		0	0	+	+	+	+	+	++
21062	YPL230W	BY4743	16_1	210	C	6		0	0	+	0	+	+	++	++
21063	YPL229W	BY4743	16_1	210	C	7		0	0	+	+	+	+	+	+
21064	YPL228W	BY4743	16_1	210	C	8		0	+	+	+	++	++	+++	++
21065	YPL227C	BY4743	16_1	210	C	9		+	+	0	+	+	+	+	+
21066	YPL226W	BY4743	16_1	210	C	10		+	0	0	0	+	+	+	+
21067	YPL225W	BY4743	16_1	210	C	11	very slow growth on auxotrophy plate	+	+	+	+	+	+	+	+
21069	YPL223C	BY4743	16_1	210	C	12		0	0	0	+	+	+	+	+
21070	YPL222W	BY4743	16_1	210	D	1	very slow growth on auxotrophy plate	+	+	+	+	++	+	+++	+++
21071	YPL221W	BY4743	16_1	210	D	2		+	0	+	+	+	+	++	+
21072	YPL220W	BY4743	16_1	210	D	3		0	0	+	+	+	+	+	+
21073	YPL219W	BY4743	16_1	210	D	4		0	0	+	+	+	+	++	++
21074	YPL218W	BY4743	16_1	210	D	5		+	+	+	+	0	+	+	+
21076	YPL216W	BY4743	16_1	210	D	6		0	+	+	+	+	+	+	+
21077	YPL215W	BY4743	16_1	210	D	7		0	0	+	0	+	+	+	+
21078	YPL214C	BY4743	16_1	210	D	8		+	0	+	+	+	+	+	+
21079	YPL213W	BY4743	16_1	210	D	9		+	+	+	+	+	+	+	+
21080	YPL212C	BY4743	16_1	210	D	10		0	+	+	+	+	+	+	+
21081	YPL211W	BY4743	16_1	210	D	11		+	+	+	+	+	+	+	+
21082	YPL210C	BY4743	16_1	210	D	12		0	0	+	+	+	+	+	+
21083	YPL209C	BY4743	16_1	210	E	1		+	0	+	+	+	+	+	+
21084	YPL208W	BY4743	16_1	210	E	2		+	+	0	+	+	0	+	+
21085	YPL207W	BY4743	16_1	210	E	3		0	+	+	0	+	+	+	+
21086	YPL206C	BY4743	16_1	210	E	4		0	+	+	+	+	0	+	+
21087	YPL205C	BY4743	16_1	210	E	5		+	+	0	+	+	+	+	++
21088	YPL204W	BY4743	16_1	210	E	6		0	0	+	+	+	+	+	++
21089	YPL203W	BY4743	16_1	210	E	7		+	+	+	+	++	+	++	+
21090	YPL202C	BY4743	16_1	210	E	8	DO NOT USE - QC FAILURE-diploid mates as an alpha, no growth on auxotrophy plate	0	+	+	+	++++	++++	++++	++++
21091	YPL201C	BY4743	16_1	210	E	9		0	+	+	+	++++	+++	+++	+++
21092	YPL200W	BY4743	16_1	210	E	10		0	+	0	0	+	+	+	+
21093	YPL199C	BY4743	16_1	210	E	11		0	+	+	+	+	+	+	+
21094	YPL198W	BY4743	16_1	210	E	12		0	0	+	+	+	+	+	+
21095	YPL197C	BY4743	16_1	210	F	1		+	0	+	0	+	+	+	+
21096	YPL196W	BY4743	16_1	210	F	2		0	0	+	+	+	+	+	+
21097	YPL195W	BY4743	16_1	210	F	3		+	0	+	+	+	+	+	+
21098	YPL194W	BY4743	16_1	210	F	4		0	0	+	+	+	+	+	+
21099	YPL193W	BY4743	16_1	210	F	5		0	0	+	+	+	+	+	+
21100	YPL192C	BY4743	16_1	210	F	6		+	+	+	+	+	+	+	+
21101	YPL191C	BY4743	16_1	210	F	7		0	0	0	+	+	+	+	+
21102	YPL190C	BY4743	16_1	210	F	8		+	0	+	+	++	++	+	++
21103	YPL189W	BY4743	16_1	210	F	9		0	0	+	+	++	+	++	++
21104	YPL188W	BY4743	16_1	210	F	10	No grow.	ND*	ND*	ND*	ND*	ND*	ND*	ND*	ND*
22065	YPL187W	BY4743	16_2	210	F	11		+	+	+	++	++	+	++	++
22066	YPL185W	BY4743	16_2	210	F	12		+	+	+	+	++	+	++	+
22067	YPL186C	BY4743	16_2	210	G	1		+	+	+	+	+	+	+	+
22068	YPL184C	BY4743	16_2	210	G	2		0	0	+	+	+	+	++	+
22070	YPL181W	BY4743	16_2	210	G	3		+	0	+	+	+	+	+	+
22071	YPL182C	BY4743	16_2	210	G	4		0	0	+	+	+	+	+	+
22072	YPL180W	BY4743	16_2	210	G	5		+	+	+	+	+	+	+	+
22073	YPL179W	BY4743	16_2	210	G	6		0	0	+	+	+	+	+	+
22074	YPL178W	BY4743	16_2	210	G	7		0	0	+	+	+	0	+	+
22075	YPL177C	BY4743	16_2	210	G	8		+	+	+	+	+	+	+	+
22077	YPL175W	BY4743	16_2	210	G	9		0	+	+	+	+	+	++	+
22078	YPL174C	BY4743	16_2	210	G	10		+	+	+	+	++	+++	++	+++
22079	YPL173W	BY4743	16_2	210	G	11		+	0	+	+	++	+	+	+
22080	YPL172C	BY4743	16_2	210	G	12		0	+	+	+	+	+	+	++
22081	YPL171C	BY4743	16_2	210	H	1		+	0	+	+	+	+	+	+
22082	YPL170W	BY4743	16_2	210	H	2		0	0	+	+	+	+	+	+
22083	YPL169C	BY4743	16_2	210	H	3		++	+++	++++	++++	+	+	+	+
22084	YPL168W	BY4743	16_2	210	H	5		+	+	++	++	+	+	+	+
22085	YPL167C	BY4743	16_2	210	H	6		+	+	+	+	+	+	++	+++
22086	YPL166W	BY4743	16_2	210	H	7		+	0	+	+	+	+	+	+
22087	YPL165C	BY4743	16_2	210	H	8		+	0	+	0	+	+	+	+
22088	YPL164C	BY4743	16_2	210	H	9		0	0	+	+	+	+	+	+
22089	YPL163C	BY4743	16_2	210	H	10		+++	++	+++	++++	+	0	0	+
22090	YPL162C	BY4743	16_2	210	H	11		0	+	+	+	++	+++	++++	++++
22091	YPL161C	BY4743	16_2	210	H	12		0	0	+	+	+	+	+	+
22092	YPL160W	BY4743	16_2	211	A	1		+	0	+	+	+	+	++	+
22093	YPL159C	BY4743	16_2	211	A	2		0	0	+	+	+	+	++	+
22095	YPL157W	BY4743	16_2	211	A	3		+	+	+	+	+	+	+	+
22096	YPL156C	BY4743	16_2	211	A	4		+	+	+	+	+	0	++	+
22097	YPL155C	BY4743	16_2	211	A	5		+	0	+	+	+	0	+	+
22098	YPL154C	BY4743	16_2	211	A	6		+	+	+	+	+	+	+	+
22099	YPL153C	BY4743	16_2	211	A	7		+	0	+	+	+	+	+	+
22100	YPL152W	BY4743	16_2	211	A	8		+	+	+	+	+	++	++	++
22101	YPL151C	BY4743	16_2	211	A	9		+	+	+	0	+	+	++	++
22102	YPL150W	BY4743	16_2	211	A	10		+	+	+	+	+	+	+	+
22103	YPL149W	BY4743	16_2	211	A	12		0	0	+	+	++	+	+	++
22105	YPL147W	BY4743	16_2	211	B	1		+	+	+	+	+	+	+	+
22107	YPL145C	BY4743	16_2	211	B	2		+	+	+	+	+	+	+	+
22108	YPL144W	BY4743	16_2	211	B	3		0	0	+	+	+	+	++	+
22109	YPL143W	BY4743	16_2	211	B	4		0	0	0	0	0	+	+	+
22110	YPL142C	BY4743	16_2	211	B	5		+	+	0	+	+	+	+	++
22111	YPL141C	BY4743	16_2	211	B	6		+	+	+	++	+	0	+	+
22112	YPL140C	BY4743	16_2	211	B	7		0	+	+	0	+	+	++	++
22113	YPL139C	BY4743	16_2	211	B	8		0	0	+	0	+	0	+	+
22114	YPL138C	BY4743	16_2	211	B	9		+	0	+	+	+	+	+	+
22115	YPL136W	BY4743	16_2	211	B	10		0	+	+	+	+	+	+	+
22117	YPL135W	BY4743	16_2	211	B	11		+	0	+	0	+	+	+	+
22119	YPL133C	BY4743	16_2	211	B	12		0	0	0	+	+	0	+	0
22122	YPL130W	BY4743	16_2	211	C	1		+	+	+	+	+	+	+	+
22123	YPL129W	BY4743	16_2	211	C	2		+	+	+	+	+	+	+	+
22124	YPL128C	BY4743	16_2	211	C	3		0	0	+	+	+	+	+	+
22125	YPL127C	BY4743	16_2	211	C	4		0	+	0	+	+	+	+	+
22126	YPL126W	BY4743	16_2	211	C	5		+	0	+	+	+	+	+	+
22127	YPL125W	BY4743	16_2	211	C	6		0	+	+	+	+	+	++	++
22128	YPL124W	BY4743	16_2	211	C	7		+	+	++	+	0	0	+	+
22129	YPL123C	BY4743	16_2	211	C	8		0	+	+	0	+	+	++	++
22130	YPL122C	BY4743	16_2	211	C	9		0	0	+	+	+	+	+++	+++
22131	YPL121C	BY4743	16_2	211	C	10		+	0	+	+	++	+	++	++
22132	YPL120W	BY4743	16_2	211	C	11		+	+	0	+	+	0	+	+
22133	YPL119C	BY4743	16_2	211	C	12		+	0	+	+	++	++	++	++
22134	YPL118W	BY4743	16_2	211	D	1		+	0	+	+	+	+	+	+
22135	YPL117C	BY4743	16_2	211	D	2		+	0	+	+	+	+	+	+
22136	YPL116W	BY4743	16_2	211	D	3		+	+	+	+	+	+	+	+
22137	YPL115C	BY4743	16_2	211	D	4		+	+	+	+	0	+	+	0
22138	YPL114W	BY4743	16_2	211	D	5		0	+	+	0	0	+	+	+
22139	YPL113C	BY4743	16_2	211	D	6		0	0	+	+	+	+	+	+
22140	YPL112C	BY4743	16_2	211	D	7		0	0	+	+	+	+	++	++
22141	YPL111W	BY4743	16_2	211	D	8		+	0	+	+	+	+	+	++
22142	YPL110C	BY4743	16_2	211	D	9		0	0	+	0	+	+	+	+
22143	YPL109C	BY4743	16_2	211	D	10		0	0	+	+	+	+	+	++
22144	YPL108W	BY4743	16_2	211	D	11		0	+	+	+	+	+	++	++
22145	YPL107W	BY4743	16_2	211	D	12		0	+	+	+	+	+	++	+
22146	YPL106C	BY4743	16_2	211	E	1		0	+	+	+	+	+	+	+
22147	YPL105C	BY4743	16_2	211	E	2		0	0	+	+	+	+	+	+
22148	YPL104W	BY4743	16_2	211	E	3		+	+	+	+	+	+	+	+
22149	YPL103C	BY4743	16_2	211	E	4		+	0	+	+	+	+	+	+
22150	YPL101W	BY4743	16_2	211	E	5		+	+	+	+	+	+	+	+
22151	YPL102C	BY4743	16_2	211	E	6		+	0	+	+	+	+	+	+
22152	YPL100W	BY4743	16_2	211	E	7		0	0	+	+	+	0	+	++
22153	YPL099C	BY4743	16_2	211	E	8		0	+	+	+	0	+	+	+
22154	YPL098C	BY4743	16_2	211	E	9		0	0	+	+	+	+	+	++
22155	YPL097W	BY4743	16_2	211	E	10		+	0	+	+	++++	+++	++++	+++
22156	YPL096W	BY4743	16_2	211	E	11		0	+	0	+	+	0	+	+
22157	YPL095C	BY4743	16_2	211	E	12		0	0	0	+	+	0	+	+
22158	YPL094C	BY4743	16_2	211	F	1		+	0	++	+	+	+	+	+
22159	YPL093W	BY4743	16_2	211	F	2		+	+	+	++	+	+	+	+
22160	YPL092W	BY4743	16_2	211	F	3		+	+	+	+	++	+	+	+
23313	YBR173C	BY4743	02_4	211	F	4		+	0	+	+	+	+	+	+
23317	YBR177C	BY4743	02_4	211	F	5		+	0	+	+	+	0	+	+
23320	YBR180W	BY4743	02_4	211	F	6	no growth on auxotrophy plate	+	+	+	+	+	+	++	++
23321	YBR181C	BY4743	02_4	211	F	7		0	+	+	+	+	+	+	++
23322	YBR182C	BY4743	02_4	211	F	8		0	+	0	+	+	+	+	+
23323	YBR183W	BY4743	02_4	211	F	9		0	+	+	+	+	+	+	+
23324	YBR184W	BY4743	02_4	211	F	10		+	+	+	+	+	+	+	++
23325	YBR185C	BY4743	02_4	211	F	11		+	+	+	+	+++	++	++	+++
23327	YBR187W	BY4743	02_4	211	F	12		0	+	+	+	+	+	+	+
23332	YBR192W	BY4743	02_4	211	G	1		0	+	+	+	+	+	+	+
23333	YBR193C	BY4743	02_4	211	G	2	no growth on auxotrophy plate	+	0	+	+	+	+	+	+
23334	YBR194W	BY4743	02_4	211	G	3		0	0	+	+	+	+	+	+
23335	YBR195C	BY4743	02_4	211	G	4		0	0	+	+	+	+	++	+
23336	YBR196C	BY4743	02_4	211	G	5		+	0	+	+	++	+	++	+
23337	YBR197C	BY4743	02_4	211	G	6		+	+	+	+	+	+	+	+
23338	YBR198C	BY4743	02_4	211	G	7		+	+	+	+	+	+	+	++
23339	YBR199W	BY4743	02_4	211	G	8		+	0	+	+	+	+	+	+
23340	YBR200W	BY4743	02_4	211	G	9	no growth on auxotrophy plate	+	+	0	+	++	++	++	+++
23341	YBR201W	BY4743	02_4	211	G	10		+	+	+	+	+	+	+	+
23342	YBR202W	BY4743	02_4	211	G	11	no growth on auxotrophy plate	+	+	0	+	+	+	++	+
23343	YBR203W	BY4743	02_4	211	G	12	no growth on auxotrophy plate	0	0	0	+	+	+	++	+
23344	YBR204C	BY4743	02_4	211	H	1		0	0	+	0	++	+	++	++
23345	YBR205W	BY4743	02_4	211	H	2		+	0	+	+	++	+	+	+
23346	YBR206W	BY4743	02_4	211	H	3		+	0	+	0	+	+	+	+
23347	YBR207W	BY4743	02_4	211	H	5		0	+	+	+	+	+	+	++
23348	YBR208C	BY4743	02_4	211	H	6		0	+	+	+	+	0	+	+
23350	YBR210W	BY4743	02_4	211	H	7		0	+	+	+	+	+	+	+
23351	YBR211C	BY4743	02_4	211	H	8		+	+	+	+	++	+	++	+
23352	YBR212W	BY4743	02_4	211	H	9		+	0	+	+	++	++	+++	+++
23353	YBR213W	BY4743	02_4	211	H	10		0	+	+	+	+	++	++	++
23354	YBR214W	BY4743	02_4	211	H	11		0	+	+	+	+	+	++	++
23355	YBR215W	BY4743	02_4	211	H	12		0	+	+	+	+	+	+	+
23356	YBR216C	BY4743	02_4	212	A	1		+	0	0	+	+	+	0	+
23357	YBR217W	BY4743	02_4	212	A	2		+	0	0	+	+	+	+	+
23358	YBR218C	BY4743	02_4	212	A	3		0	+	0	+	+	++	+	+
23359	YBR219C	BY4743	02_4	212	A	4		0	0	0	+	+	++	+	+
23360	YBR220C	BY4743	02_4	212	A	5		0	0	+	+	+	+	+	+
23362	YBR222C	BY4743	02_4	212	A	6		+	0	+	0	+	+	+	+
23363	YBR223C	BY4743	02_4	212	A	7		+	+	0	+	+	+	+	0
23364	YBR224W	BY4743	02_4	212	A	8		0	+	+	+	+	+	+	+
23365	YBR225W	BY4743	02_4	212	A	9		0	+	0	+	+++	++++	++	++
23366	YBR226C	BY4743	02_4	212	A	10		0	0	+	+	+	+	+	+
23367	YBR227C	BY4743	02_4	212	A	11		0	0	0	+	+	+	+	0
23368	YBR228W	BY4743	02_4	212	B	1		0	+	+	+	+	++	+	+
23369	YBR229C	BY4743	02_4	212	B	2		0	+	0	+	+	++	+	+
23370	YBR230C	BY4743	02_4	212	B	3		+	0	0	0	+	++	+	+
23371	YBR231C	BY4743	02_4	212	B	4		0	0	0	+	0	+	+	+
23373	YBR233W	BY4743	02_4	212	B	5		0	0	0	+	++	++	+	++
23374	YBR234C	BY4743	02_4	212	B	6		0	0	+	+	++++	++++	++++	+++
23376	YBR236C	BY4743	02_4	212	B	7		+	+	+	+	+	+	+	+
23377	YBR237W	BY4743	02_4	212	B	8		0	0	+	+	++	++	++	+
23378	YBR238C	BY4743	02_4	212	B	9		+	0	0	0	+	+	+	+
23379	YBR239C	BY4743	02_4	212	B	10		0	0	+	0	++	+++	++	+
23380	YBR240C	BY4743	02_4	212	B	11		0	0	+	+	++	+	+	+
23381	YBR241C	BY4743	02_4	212	B	12		+	+	+	0	+	+	0	+
23382	YBR242W	BY4743	02_4	212	C	1		0	0	0	+	+	+	+	+
23383	YBR243C	BY4743	02_4	212	C	2		+	0	0	+	++	+	+	++
23384	YBR244W	BY4743	02_4	212	C	3		0	0	0	+	+	++	+	++
23385	YBR245C	BY4743	02_4	212	C	4		+	0	+	+	+	++	+	+
23386	YBR246W	BY4743	02_4	212	C	5		+	+	0	0	++	+	+	+
23387	YBR247C	BY4743	02_4	212	C	6		+	0	0	+	+	+	+	+
23388	YBR248C	BY4743	02_4	212	C	7		0	0	0	+	+++	++++	++	+
23389	YBR249C	BY4743	02_4	212	C	8		+	0	+	0	++	++	+	+
23390	YBR250W	BY4743	02_4	212	C	9		0	0	0	+	++	++	+	++
23391	YBR251W	BY4743	02_4	212	C	10		0	0	+	+	+++	+++	++	++
23392	YBR252W	BY4743	02_4	212	C	11		0	+	+	+	+	+	+	+
23393	YBR253W	BY4743	02_4	212	C	12		+	+	+	+	+	+	0	+
23394	YBR254C	BY4743	02_4	212	D	1		+	0	+	+	++++	++++	++++	++++
23395	YBR255W	BY4743	02_4	212	D	2		0	0	+	+	++	+++	+	+
23396	YBR256C	BY4743	02_4	212	D	3		+	+	+	+	+	++	+	++
23398	YBR258C	BY4743	02_4	212	D	4		0	0	+	+	+	++	+	+
23399	YBR259W	BY4743	02_4	212	D	5		0	+	+	+	++++	++++	+	++
23401	YBR261C	BY4743	02_4	212	D	6		0	0	+	0	+	+	+	+
23402	YBR262C	BY4743	02_4	212	D	7		+	0	+	0	+	+	+	+
23403	YBR263W	BY4743	02_4	212	D	8		0	0	+	+	++	+	+	+
23404	YBR264C	BY4743	02_4	212	D	9		0	0	+	+	+	+	+	+
23405	YBR265W	BY4743	02_4	212	D	10		0	0	0	+	+	+	+	+
23406	YBR266C	BY4743	02_4	212	D	11		+	0	0	0	+	+	+	+
23407	YBR267W	BY4743	02_4	212	D	12		0	+	0	+	+	+	+	+
23985	YDR049W	BY4743	04_4	212	E	1	no growth on auxtrophy plate	0	+	+	0	+	++	+	++
23986	YDR050C	BY4743	04_4	212	E	2		+	0	0	+	+	+	+	+
23987	YDR051C	BY4743	04_4	212	E	3		+	0	+	+	+	++	+	+
23988	YDR052C	BY4743	04_4	212	E	4		+	0	0	+	+	+	+	+
23989	YDR053W	BY4743	04_4	212	E	5		0	+	+	0	+	+	+	+
23990	YDR054C	BY4743	04_4	212	E	6		+	0	+	+	++++	++++	+	++
23991	YDR055W	BY4743	04_4	212	E	7		0	+	+	+	+	+	+	+
23993	YDR057W	BY4743	04_4	212	E	8		+	0	+	+	+	+	+	+
23994	YDR059C	BY4743	04_4	212	E	9		+	0	0	+	++	+	++	+
23995	YDR060W	BY4743	04_4	212	E	10		0	0	0	+	++++	++++	++++	++
23996	YDR061W	BY4743	04_4	212	E	11		0	+	+	+	+	+	+	+
23997	YDR062W	BY4743	04_4	212	E	12		+	0	+	+	+	+	+	+
23998	YDR063W	BY4743	04_4	212	F	1		0	0	+	0	++	++	++	+++
23999	YDR064W	BY4743	04_4	212	F	2		+	0	+	0	+	+	+	+
24000	YDR065W	BY4743	04_4	212	F	3		0	0	+	+	++	+++	+	+
24001	YDR066C	BY4743	04_4	212	F	4		0	+	0	+	+	+	+	+
24002	YDR067C	BY4743	04_4	212	F	5		+	+	+	+	+	+	+	+
24003	YDR068W	BY4743	04_4	212	F	6		+	+	+	+	++	++	+	+
24004	YDR069C	BY4743	04_4	212	F	7		+	0	+	+	+	+	++	+
24005	YDR070C	BY4743	04_4	212	F	8		+	0	+	+	+	+	++	++
24007	YDR072C	BY4743	04_4	212	F	9		0	+	0	+	+	+	+	+
24008	YDR073W	BY4743	04_4	212	F	10		0	+	+	+	+	++	+	+
24010	YDR075W	BY4743	04_4	212	F	11		+	0	+	+	+	+	+	+
24011	YDR076W	BY4743	04_4	212	F	12		+	+	+	0	++	+	+	+
24013	YDR078C	BY4743	04_4	212	G	1		0	+	+	0	+	+	+	+
24014	YDR079W	BY4743	04_4	212	G	2		0	0	+	0	++	+	+	+
24015	YDR080W	BY4743	04_4	212	G	3	no growth on auxotrophy plate, slow growth on glycerol plate	+	+	+	0	+	+	+	+
24016	YDR081C	BY4743	04_4	212	G	4		0	0	+	+	+	++	+	++
24017	YDR082W	BY4743	04_4	212	G	5		+	+	+	+	+	++	+	+
24018	YDR083W	BY4743	04_4	212	G	6		0	+	+	+	+	+	+	+
24019	YDR084C	BY4743	04_4	212	G	7		+	+	+	0	+	++	+	+
24020	YDR085C	BY4743	04_4	212	G	8		+	+	+	+	+	++++	++	++
24021	YDR086C	BY4743	04_4	212	G	9		+	+	+	0	+	++	0	+
24022	YDR087C	BY4743	04_4	212	G	10		+	+	0	+	+	+	+	+
24023	YDR088C	BY4743	04_4	212	G	11		0	+	0	+	+	+	++	+
24024	YDR089W	BY4743	04_4	212	G	12		0	+	0	0	++	+	+	+
24025	YDR090C	BY4743	04_4	212	H	1		+	+	+	0	+	+	+	+
24026	YDR091C	BY4743	04_4	212	H	2		0	0	0	0	++++	++++	+++	+++
24027	YDR092W	BY4743	04_4	212	H	3		0	+	+	+	+	+	+	+
24028	YDR093W	BY4743	04_4	212	H	5		0	0	+	0	++++	++++	++	++
24029	YDR094W	BY4743	04_4	212	H	6		0	0	+	+	+++	+++	+	+
24030	YDR095C	BY4743	04_4	212	H	7		0	0	+	0	+++	++	+	+
24031	YDR096W	BY4743	04_4	212	H	8		0	0	+	0	+++	++	++	+++
24032	YDR097C	BY4743	04_4	212	H	9		0	0	+	+	++++	++++	++++	++++
24033	YDR098C	BY4743	04_4	212	H	10		+	0	0	+	+	+	+	+
24034	YDR099W	BY4743	04_4	212	H	11		+	+	+	+	+	++	+	+
24035	YDR100W	BY4743	04_4	212	H	12		0	+	+	+	+	+	0	+
24036	YDR101C	BY4743	04_4	213	A	1		+	+	+	+	+	0	+	+
24037	YDR102C	BY4743	04_4	213	A	2		0	+	+	+	++++	++	+++	++
24038	YDR103W	BY4743	04_4	213	A	3		0	0	0	+	+	+	++	++
24039	YDR104C	BY4743	04_4	213	A	4		0	+	+	+	+	+	+	++
24040	YDR105C	BY4743	04_4	213	A	5		0	+	+	0	+	0	+	+
24041	YDR107C	BY4743	04_4	213	A	6		+	+	+	+	++	+	+	++
24042	YDR108W	BY4743	04_4	213	A	7		+	+	+	+	++	+	++	++
24043	YDR109C	BY4743	04_4	213	A	8		0	0	+	+	+	+	+	+
24044	YDR110W	BY4743	04_4	213	A	9		0	+	+	+	+++	++	+++	++
24045	YDR111C	BY4743	04_4	213	A	10		+	+	+	+	+	+	++	+
24046	YDR112W	BY4743	04_4	213	A	11		+	0	+	+	++	++	+	++
24047	YDR113C	BY4743	04_4	213	A	12		+	+	+	+	+	+	+	+
24048	YDR114C	BY4743	04_4	213	B	2		+	0	+	+	++	++	+	+
24049	YDR115W	BY4743	04_4	213	B	3		+	0	+	0	+	++	+	+
24050	YDR116C	BY4743	04_4	213	B	4		0	+	+	0	+	+	+	+
24051	YDR117C	BY4743	04_4	213	B	5		0	0	+	+	+	+	+	+
24052	YDR118W	BY4743	04_4	213	B	6		0	+	+	+	++	+	+	+
24053	YDR119W	BY4743	04_4	213	B	7		+	+	+	+	+	0	++	+
24054	YDR120C	BY4743	04_4	213	B	8		+	0	+	+	+	+	++	++
24055	YDR121W	BY4743	04_4	213	B	9		+	0	+	+	++	++	+++	++
24056	YDR122W	BY4743	04_4	213	B	10		+	0	+	+	++	+	+	++
24057	YDR123C	BY4743	04_4	213	B	11		+	+	+	+	+	+	+	+
24058	YDR124W	BY4743	04_4	213	B	12		0	0	+	+	+	+	++	++
24059	YDR125C	BY4743	04_4	213	C	1		0	0	+	+	+	++	++	+
24060	YDR126W	BY4743	04_4	213	C	2		0	0	+	+	++	+++	++	+
24061	YDR127W	BY4743	04_4	213	C	3		0	0	+	0	+	++	+	+
24062	YDR128W	BY4743	04_4	213	C	4		0	0	+	+	+	+	+	+
24063	YDR129C	BY4743	04_4	213	C	5		0	+	0	+	+	+	+	+
24064	YDR130C	BY4743	04_4	213	C	6		+	0	+	+	+	+	+	+
24065	YDR131C	BY4743	04_4	213	C	7		0	0	+	+	+	+	+	+
24066	YDR132C	BY4743	04_4	213	C	8		+	+	+	+	+	+	+	+
24067	YDR133C	BY4743	04_4	213	C	9		+	+	+	+	+++	++++	++++	++
24068	YDR134C	BY4743	04_4	213	C	10		0	0	0	+	+	+	+	+
24069	YDR135C	BY4743	04_4	213	C	11		0	+	+	+	+	+	+	+
24070	YDR136C	BY4743	04_4	213	C	12		0	0	+	+	++	+++	++	++
24071	YDR137W	BY4743	04_4	213	D	1		+	+	+	+	++	+	+	+
24072	YDR138W	BY4743	04_4	213	D	2		0	+	+	+	++++	+++	++	+
24073	YDR139C	BY4743	04_4	213	D	3		+	+	+	+	+	+	+	+
24074	YDR140W	BY4743	04_4	213	D	4		0	+	0	+	+	+	+	0
24075	YDR141C	BY4743	04_4	213	D	5		+	+	0	0	+	+	+	+
24076	YDR142C	BY4743	04_4	213	D	6		+	0	+	+	+	+	+	+
24077	YDR143C	BY4743	04_4	213	D	7		0	0	+	0	+	+	++	+
24078	YDR144C	BY4743	04_4	213	D	8		0	+	+	+	+	+	++	+
24079	YDR145W	BY4743	04_4	213	D	9		+	0	+	+	+	+	+	+
24080	YDR146C	BY4743	04_4	213	D	10		+	+	+	+	+	+	+	+
24177	YDR338C	BY4743	04_7	213	D	11	no growth on auxotrophy plate, no growth on glycerol plate	+	0	+	+	+	0	+	+
24178	YDR339C	BY4743	04_7	213	D	12	slow growth on glycerol plates	+	+	+	+	+	+	+	++
24179	YDR340W	BY4743	04_7	213	E	1	slow growth on glycerol plates	0	0	+	+	+	+	+	+
24180	YDR341C	BY4743	04_7	213	E	2	no growth on auxotrophy plate, no growth on glycerol plate	+	0	+	0	+	+	+	+
24181	YDR344C	BY4743	04_7	213	E	3		+	+	+	+	+	++	++	++
24182	YDR345C	BY4743	04_7	213	E	4		+	0	0	+	+	+	++	++
24183	YDR346C	BY4743	04_7	213	E	5		+	+	0	+	+	+	+	+
24185	YDR348C	BY4743	04_7	213	E	6	slow growth on glycerol plates	0	+	0	+	+	+	+	+
24186	YDR349C	BY4743	04_7	213	E	7		0	0	+	+	+	+	+	+
24187	YDR350C	BY4743	04_7	213	E	8		+	0	+	+	+	++	+++	+
24188	YDR351W	BY4743	04_7	213	E	9		0	+	+	0	++	+	+	+
24189	YDR352W	BY4743	04_7	213	E	10		0	0	+	+	++	+	+	+
24190	YDR353W	BY4743	04_7	213	E	11		0	0	+	0	++	+	+	+
24191	YDR354W	BY4743	04_7	213	E	12		0	0	+	+	+++	++++	++++	++++
24192	YDR355C	BY4743	04_7	213	F	1	slow growth on auxotrophy plate, no growth on glycerol plate	0	0	+	+	+++	+++	++	+
24193	YDR356W	BY4743	04_7	213	F	2		0	+	+	+	++	+	+	+
24194	YDR357C	BY4743	04_7	213	F	3		0	+	+	+	+	+	+	+
24195	YDR358W	BY4743	04_7	213	F	4		0	+	+	+	+	+	+	+
24196	YDR359C	BY4743	04_7	213	F	5		+	0	+	+	+	+	+	+
24197	YDR360W	BY4743	04_7	213	F	6		0	0	+	+	++	+	+	++
24198	YDR361C	BY4743	04_7	213	F	7		0	0	0	+	++	+	+	++
24199	YDR362C	BY4743	04_7	213	F	8		0	0	+	+	+	++++	+++	+
24200	YDR363W	BY4743	04_7	213	F	9		+	+	+	+	+	+	+	+
24201	YDR364C	BY4743	04_7	213	F	10	no growth on auxotrophy plate, no growth on glycerol plate	0	0	+	+	+++	+++	+++	+
24202	YDR365C	BY4743	04_7	213	F	11		0	0	+	+	++	+	+	+
24203	YDR367W	BY4743	04_7	213	F	12		0	0	+	+	+	0	+	++
24204	YDR368W	BY4743	04_7	213	G	1		0	0	0	0	++++	++++	++++	+++
24205	YDR369C	BY4743	04_7	213	G	2		+	0	+	0	+	+	++	+
24206	YDR370C	BY4743	04_7	213	G	3		0	0	+	+	+	+	+	+
24207	YDR371W	BY4743	04_7	213	G	4		0	0	+	+	+	++	+	+
24208	YDR372C	BY4743	04_7	213	G	5		+++	++	++	++++	+	+	+	+
24209	YDR373W	BY4743	04_7	213	G	6		0	+	+	+	++++	++++	+++	++++
24210	YDR374C	BY4743	04_7	213	G	7		0	0	+	+	+	+	+	++
24211	YDR375C	BY4743	04_7	213	G	8		0	+	+	+	0	+	+	+
24212	YDR376W	BY4743	04_7	213	G	9		+	+	+	+	+	+	+	+
24214	YDR378C	BY4743	04_7	213	G	10		+	+	0	+	++	++	++	++
24216	YDR380W	BY4743	04_7	213	G	11		0	+	+	+	+	+	+	+
24217	YDR381W	BY4743	04_7	213	G	12		0	+	+	+	+	+	+	++
24218	YDR382W	BY4743	04_7	213	H	1		+	0	0	+	+	+	+	+
24219	YDR383C	BY4743	04_7	213	H	2	slow growth on auxotrophy plate, slow growth on glycerol plate	0	0	+	+	+	+	+	+
24220	YDR384C	BY4743	04_7	213	H	3	no growth on auxotrophy plate	0	0	+	+	++	+	+	++
24221	YDR385W	BY4743	04_7	213	H	5		0	+	0	+	+	+	+	+
24222	YDR386W	BY4743	04_7	213	H	6		+	+	+	+	+	+	++	+
24223	YDR387C	BY4743	04_7	213	H	7		0	0	+	+	+	+	+	+
24224	YDR388W	BY4743	04_7	213	H	8		0	0	0	+	+++	++	++	++
24225	YDR389W	BY4743	04_7	213	H	9	slow growth on glycerol plate	+	+	+	+	+	+	++	++
24226	YDR390C	BY4743	04_7	213	H	10		+	0	+	+	+	+	+	+
24227	YDR391C	BY4743	04_7	213	H	11		+	++	+++	++	+	0	+	+
24228	YDR392W	BY4743	04_7	213	H	12	slow growth on glycerol plate	0	0	+	+	+	+	+	+
24229	YDR393W	BY4743	04_7	214	A	1		0	+	+	+	++	+	+	+
24230	YDR394W	BY4743	04_7	214	A	2		0	+	+	+	+	+	+	+
24231	YDR395W	BY4743	04_7	214	A	3		0	+	+	+	+	+	+	+
24232	YDR396W	BY4743	04_7	214	A	4		+	0	+	+	++	++	++	+
24233	YDR397C	BY4743	04_7	214	A	5		0	+	+	+	+	+	+	+
24234	YDR398W	BY4743	04_7	214	A	6		+	+	+	+	+	+	+	+
24235	YDR399W	BY4743	04_7	214	A	7		0	+	+	+	+	++	++	++
24236	YDR400W	BY4743	04_7	214	A	8		0	+	0	+	+	++	++	++
24238	YDR402C	BY4743	04_7	214	A	9		0	0	+	+	+	+	++	++
24239	YDR403W	BY4743	04_7	214	A	10		0	0	+	+	+	+	++	++
24240	YDR404C	BY4743	04_7	214	A	11	slow growth on auxotrophy plate, slow growth on glycerol plate	0	+	+	+	+	+	+	++
24241	YDR405W	BY4743	04_7	214	A	12		0	0	+	+	+	+	++	+++
24242	YDR406W	BY4743	04_7	214	B	1		0	0	+	+	+	+	+	+
24243	YDR407C	BY4743	04_7	214	B	3		+	+	+	+	+	+	+	+
24244	YDR408C	BY4743	04_7	214	B	4		0	0	+	+	+	0	+	+
24245	YDR409W	BY4743	04_7	214	B	5		0	+	+	0	+	+	+	+
24246	YDR410C	BY4743	04_7	214	B	6		+	+	0	+	+	+	+	+
24247	YDR411C	BY4743	04_7	214	B	7		0	0	+	+	+	+	+	+
24248	YDR412W	BY4743	04_7	214	B	8		0	+	+	+	+	+	++	++
24249	YDR413C	BY4743	04_7	214	B	9		+	+	++	+++	+	+	+	+
24250	YDR414C	BY4743	04_7	214	B	10		0	+	0	+	+	++	+	++
24251	YDR415C	BY4743	04_7	214	B	11		0	+	+	+	+	+	++	+
24252	YDR416W	BY4743	04_7	214	B	12		+	+	+	+	+	+	+	+
24254	YDR418W	BY4743	04_7	214	C	1	slow growth on auxotrophy plate, very slow growth on glycerol plate	0	0	+	+	++++	++	+++	++
24255	YDR419W	BY4743	04_7	214	C	2		0	0	+	+	+++	+	++	+
24256	YDR420W	BY4743	04_7	214	C	3		0	+	+	+	+	+	+	+
24257	YDR421W	BY4743	04_7	214	C	4		0	0	0	0	+	+	++	+
24258	YDR422C	BY4743	04_7	214	C	5		0	0	+	+	+	+	+	+
24261	YDR425W	BY4743	04_7	214	C	6	slow growth on auxotrophy plate, no growth on glycerol plate	0	+	+	+	+	+	++	+
24262	YDR426C	BY4743	04_7	214	C	7		0	+	+	+	++	+	+++	++++
24263	YDR427W	BY4743	04_7	214	C	8		+	+	+	+	+	+	+	+
24264	YDR428C	BY4743	04_7	214	C	9		0	0	+	+	+	+	+	+
24265	YDR429C	BY4743	04_7	214	C	10		+	0	+	+	+	+	+	+
24266	YDR430C	BY4743	04_7	214	C	11		+	+	+	+	+	+	+	+
24267	YDR431W	BY4743	04_7	214	C	12	slow growth on auxotrophy plate, slow growth on glycerol plate	+	+	+	0	+	+	+	+
24268	YDR432W	BY4743	04_7	214	D	1		0	+	+	+	+	+	+	+
24269	YDR433W	BY4743	04_7	214	D	2		+	+	++	++	+	+	+	+
24270	YDR434W	BY4743	04_7	214	D	3	slow growth on auxotrophy plate, no growth on glycerol plate	+	+	+	+	+	+	++	++
24271	YDR435C	BY4743	04_7	214	D	4	slow growth on auxotrophy plate, slow growth on glycerol plate	0	0	0	+	+	+	+	+
20241	YEL001C	BY4743	05_2	214	D	5		0	0	+	+	++	+	++	++
20242	YEL002C	BY4743	05_2	214	D	6		0	0	+	0	+	+	+	+
20243	YEL003W	BY4743	05_2	214	D	7		0	0	+	+	+	+	+	+
20244	YEL004W	BY4743	05_2	214	D	8		0	+	+	+	+	+	+	+
20245	YEL005C	BY4743	05_2	214	D	9		+	0	+	+	+	+	+	+
20246	YEL006W	BY4743	05_2	214	D	10		+	+	0	+	+	+	++++	++++
20247	YEL007W	BY4743	05_2	214	D	11		+	0	+	+	+	+	+	+
20248	YEL008W	BY4743	05_2	214	D	12		+	+	+	+	+	+	+	+
20249	YEL009C	BY4743	05_2	214	E	1		+	0	+	+	+	+	+	+
20250	YEL010W	BY4743	05_2	214	E	2		0	+	+	0	+	+	+	++
20253	YEL013W	BY4743	05_2	214	E	3		0	+	+	+	+	+	+	+
20254	YEL014C	BY4743	05_2	214	E	4		0	0	+	+	+	+	+	+
20255	YEL015W	BY4743	05_2	214	E	5	slow growth on auxotrophy plate, slow growth on glycerol plate	0	0	+	+	+	+	+	+
20256	YEL016C	BY4743	05_2	214	E	6	slow growth on auxotrophy plate, slow growth on glycerol plate	0	+	+	+	+	+	+	+
20257	YEL017C-A	BY4743	05_2	214	E	7	slow growth on glycerol plate	0	0	+	+	+	+	+	++
20258	YEL017W	BY4743	05_2	214	E	8	slow growth on glycerol plate	+	0	+	+	+	+	+	+
20259	YEL018W	BY4743	05_2	214	E	9		0	0	0	+	+	+	+	+
20260	YEL019C	BY4743	05_2	214	E	10	slow growth on glycerol plate	+	+	+	+	+	+	+	++
20261	YEL020C	BY4743	05_2	214	E	11	slow growth on auxotrophy plate	0	+	+	+	+	+	+	+
20264	YEL023C	BY4743	05_2	214	E	12	slow growth on glycerol plate	+	+	+	+	+	+	+	+
20265	YEL024W	BY4743	05_2	214	F	1		0	+	+	0	+	+	+	+
20266	YEL025C	BY4743	05_2	214	F	2		0	+	+	+	++	++	++++	+++
20267	YEL026W	BY4743	05_2	214	F	3		0	+	+	+	+	+	+	+
20268	YEL027W	BY4743	05_2	214	F	4	slow growth on glycerol plate	0	+	+	+	+	+	+	+
20269	YEL028W	BY4743	05_2	214	F	5	slow growth on glycerol plate	0	+	+	+	++	+	+++	++
20270	YEL029C	BY4743	05_2	214	F	6		0	+	+	+	++	++	+++	++
20271	YEL030W	BY4743	05_2	214	F	7		+	0	+	+	+	++	+	+
20272	YEL031W	BY4743	05_2	214	F	8		0	+	+	+	++	+	+	+
20273	YEL032W	BY4743	05_2	214	F	9	slow growth on auxotrophy plate, slow growth on glycerol plate	0	+	+	++	+	+	+	+
20276	YEL035C	BY4743	05_2	214	F	10		0	0	+	+	+	+	+	+
20277	YEL036C	BY4743	05_2	214	F	11		0	+	+	+	+	+	+	++
20278	YEL037C	BY4743	05_2	214	F	12		0	+	+	+	++	+	+	+
20279	YEL038W	BY4743	05_2	214	G	1		0	+	0	+	+	+	++	+
20280	YEL039C	BY4743	05_2	214	G	2	slow growth on auxotrophy plate, slow growth on glycerol plate	0	0	+	+	+	+	+	+
20281	YEL040W	BY4743	05_2	214	G	3		+	+	+	+	++	++	+++	++
20282	YEL041W	BY4743	05_2	214	G	4		0	0	+	+	+	+	+	+
20283	YEL042W	BY4743	05_2	214	G	5		0	0	+	0	+	+	+	+
20284	YEL043W	BY4743	05_2	214	G	6	no growth on auxotrophy plate, no growth on glycerol plate	+	0	+	+	+	+	++	+
20285	YEL044W	BY4743	05_2	214	G	7	no growth on auxotrophy plate, no growth on glycerol plate	0	+	+	+	++	++	++	+++
20288	YEL047C	BY4743	05_2	214	G	8		+	+	+	+	+	0	+	+
20289	YEL048C	BY4743	05_2	214	G	9		0	+	+	+	+	+	+	+
20290	YEL049W	BY4743	05_2	214	G	10		0	+	+	+	+	+	++	++
20291	YEL050C	BY4743	05_2	214	G	11		0	0	+	+	+	+	+	+
20292	YEL051W	BY4743	05_2	214	G	12		0	0	+	+	+	+	+	++
20293	YEL052W	BY4743	05_2	214	H	1		+	+	+	+	0	+	+	0
20294	YEL053C	BY4743	05_2	214	H	2		+	+	+	+	+	+	++	+
20295	YEL054C	BY4743	05_2	214	H	3	slow growth on auxotrophy plate, slow growth on glycerol plate	+	0	+	+	++	++	+++	+++
20296	YEL055C	BY4743	05_2	214	H	5	no growth on auxotrophy plate	+	+	+	++	+	+	+	+
20297	YEL056W	BY4743	05_2	214	H	6		0	0	+	+	+	+	+	+
20298	YEL057C	BY4743	05_2	214	H	7		0	0	+	+	+	+	+	+
20301	YEL059W	BY4743	05_2	214	H	8	slow growth on glycerol plate	+	0	+	+	+	++	+	+
20302	YEL060C	BY4743	05_2	214	H	9	slow growth on auxotrophy plate, slow growth on glycerol plate	+	0	+	+	+	+	+	+
20304	YEL062W	BY4743	05_2	214	H	10		0	+	+	+	+	+	+	+
20305	YEL063C	BY4743	05_2	214	H	11		0	0	+	+	+	+	++	++
20306	YEL064C	BY4743	05_2	214	H	12		0	+	+	+	+	+	+	+
20308	YEL066W	BY4743	05_2	215	A	1		+	+	0	0	+	+	+	+
20309	YEL067C	BY4743	05_2	215	A	2	slow growth on auxotrophy plate, slow growth on glycerol plate	0	0	0	+	++++	++	++	+
20310	YEL068C	BY4743	05_2	215	A	3		+	+	+	+	+	++	+	+
20313	YEL071W	BY4743	05_2	215	A	4		+	+	0	0	+	+	+	+
20323	YER002W	BY4743	05_2	215	A	5	slow growth on YPD+G418, no growth auxotrophy plate,no growth glycerol plate	+	0	0	0	++	+	+	+
20324	YER003C	BY4743	05_2	215	A	6	slow growth on glycerol plate	0	+	+	+	++	+	+	+
20325	YER004W	BY4743	05_2	215	A	7		+	+	0	+	++	+	+	+
20326	YER005W	BY4743	05_2	215	A	8		+	+	+	+	+++	+++	++	+
20327	YER006W	BY4743	05_2	215	A	9		+	+	0	+	++	+++	+	+
20328	YER007C-A	BY4743	05_2	215	A	10	slow growth on glycerol plate	0	0	0	+	++++	+++	++	++
20330	YER008C	BY4743	05_2	215	A	11	slow growth on auxotrophy plate	0	+	+	+	+	+	+	+
20331	YER009W	BY4743	05_2	215	A	12		+	0	+	+	+	+	+	+
20332	YER010C	BY4743	05_2	215	B	1	slow growth on glycerol plate	+	0	0	+	+	+	++	+
20333	YER011W	BY4743	05_2	215	B	2	slow growth on glycerol plate	0	+	0	0	+	++	+	+
20334	YER012W	BY4743	05_2	215	B	4	slow growth on glycerol plate	0	+	+	+	++	+	+	+
20335	YER013W	BY4743	05_2	215	B	5		0	0	0	+	+	++	+	+
20145	YER014C-A	BY4743	05_3	215	B	6		0	0	0	+	++++	++	+	++
20147	YER016W	BY4743	05_3	215	B	7		0	+	+	+	+	+	+	+
20148	YER017C	BY4743	05_3	215	B	8		+	+	+	0	0	+	+	+
20149	YER018C	BY4743	05_3	215	B	9		0	0	+	+	+	++	+	+
20151	YER019C-A	BY4743	05_3	215	B	10		+	0	0	+	++	+	+	0
20152	YER020W	BY4743	05_3	215	B	11		+	0	+	+	+	++	+	+
20153	YER021W	BY4743	05_3	215	B	12		0	+	0	+	+	+	+	++
20154	YER022W	BY4743	05_3	215	C	1		+	0	0	0	+	+	+	+
20155	YER023W	BY4743	05_3	215	C	2		+	0	0	0	++	+++	+	+
20156	YER024W	BY4743	05_3	215	C	3		+	+	0	+	+++	++++	++	+
20157	YER025W	BY4743	05_3	215	C	4		+	0	+	0	++	+	+	+
20159	YER027C	BY4743	05_3	215	C	5	slow growth on auxotrophy plate	0	+	+	0	+	+	+	0
20162	YER030W	BY4743	05_3	215	C	6		0	0	0	0	++	+	+	+
20164	YER032W	BY4743	05_3	215	C	7		+	0	+	+	+	++	+	+
20165	YER033C	BY4743	05_3	215	C	8		0	+	+	+	++++	++++	+++	+++
20167	YER035W	BY4743	05_3	215	C	9		+	+	+	+	++++	++++	++	+++
20168	YER036C	BY4743	05_3	215	C	10		0	0	+	+	+++	+++	++	++
20169	YER037W	BY4743	05_3	215	C	11	no growth on auxotrophy plate	+	+	+	+	+	+	+	+
20170	YER038C	BY4743	05_3	215	C	12		+	0	+	+	+	0	+	0
20171	YER038W-A	BY4743	05_3	215	D	1		+	0	+	+	+	+++	+	++
20172	YER039C	BY4743	05_3	215	D	2		+++	++++	++	++++	+	+	+	0
20173	YER040W	BY4743	05_3	215	D	3		0	0	0	+	+	++	+	+
20174	YER041W	BY4743	05_3	215	D	4		+	+	0	+	+	++	+	+
20175	YER042W	BY4743	05_3	215	D	5		+	+	0	+	+	+	+	+
20176	YER043C	BY4743	05_3	215	D	6		0	0	+	0	+	+	+	+
20177	YER044C	BY4743	05_3	215	D	7		+	+	0	+	+	+	+	+
20178	YER044C-A	BY4743	05_3	215	D	8		0	0	+	+	+++	++	+	+
20179	YER045C	BY4743	05_3	215	D	9		+	0	+	+	++	+	+	+
20181	YER046W-A	BY4743	05_3	215	D	10		+	0	0	+	+	++	+	+
20182	YER047C	BY4743	05_3	215	D	11		0	+	+	+	+	+	+	++
20183	YER048C	BY4743	05_3	215	D	12		0	+	+	+	+	+	+	+
20184	YER049W	BY4743	05_3	215	E	1		+	+	0	0	++	++++	+++	++
20185	YER050C	BY4743	05_3	215	E	2		0	+	0	+	++	++	+	+
20186	YER051W	BY4743	05_3	215	E	3		0	+	+	+	+	+	0	+
20187	YER052C	BY4743	05_3	215	E	4		+	+	0	+	++	++	++	+
20188	YER053C	BY4743	05_3	215	E	5		++	+	+	+	+	0	0	0
20189	YER054C	BY4743	05_3	215	E	6		+	0	0	0	++	++	+	+
20190	YER055C	BY4743	05_3	215	E	7		+	+	0	+	++	++	+	+
20191	YER056C	BY4743	05_3	215	E	8	no growth on auxotrophy plate, no growth on glycerol plate	+	0	0	0	++++	++++	++	++++
20192	YER056C-A	BY4743	05_3	215	E	9		+	+	+	+	+	+	+	0
20193	YER057C	BY4743	05_3	215	E	10	slow growth on auxotrophy plate	+	+	0	0	+++	++++	++	++++
20195	YER059W	BY4743	05_3	215	E	11		0	+	0	+	++++	++++	+++	++++
20196	YER060W	BY4743	05_3	215	E	12		+	0	+	+	+	+	+	+
20197	YER060W-A	BY4743	05_3	215	F	1		0	+	0	+	+	+	+	+
20198	YER061C	BY4743	05_3	215	F	2		0	+	+	+	+	++	+	+
20199	YER062C	BY4743	05_3	215	F	3		0	+	+	+	++	++	+	+
20202	YER065C	BY4743	05_3	215	F	4		+	0	+	0	+	++	+	+
20204	YER066C-A	BY4743	05_3	215	F	5		0	0	+	0	+	+	+	+
20205	YER067W	BY4743	05_3	215	F	6		0	+	0	+	+	+	+	+
20206	YER067C-A	BY4743	05_3	215	F	7		+	+	+	0	+	++	+	++
20207	YER068W	BY4743	05_3	215	F	8		+	+	+	0	+	+	0	+
20208	YER068C-A	BY4743	05_3	215	F	9		+	+	0	0	+	+	+	+
20209	YER069W	BY4743	05_3	215	F	10		0	+	0	+	++	+	0	+
20210	YER070W	BY4743	05_3	215	F	11		+	+	+	+	+	+	+	+
20211	YER071C	BY4743	05_3	215	F	12		+	+	0	+	+	0	+	+
20212	YER072W	BY4743	05_3	215	G	1		0	0	0	+	++	+++	++	++
20213	YER073W	BY4743	05_3	215	G	2		+	0	+	+	+	+	0	+
20214	YER074W	BY4743	05_3	215	G	3		0	+	0	0	+++	++++	+++	++
20215	YER075C	BY4743	05_3	215	G	4		+	+	+	0	+	+	+	+
20219	YER079W	BY4743	05_3	215	G	5		0	+	0	+	+	+	+	+
20220	YER080W	BY4743	05_3	215	G	6		+	0	+	0	+	+	+	+
20221	YER081W	BY4743	05_3	215	G	7		0	+	+	+	++++	++++	++	++++
20222	YER082C	BY4743	05_3	215	G	8		0	+	+	+	++	+	+	+++
20223	YER083C	BY4743	05_3	215	G	9		+	+	+	0	+	+	+	+
20224	YER084W	BY4743	05_3	215	G	10		+	0	0	+	++	+	+	++
20225	YER085C	BY4743	05_3	215	G	11		+	+	+	+	++	+	+	+
20227	YER087W	BY4743	05_3	215	G	12		0	+	+	+	+	+	+	+
20228	YER087C-A	BY4743	05_3	215	H	1		0	0	0	0	++++	++++	+++	++++
24753	YGR123C	BY4743	07_5	215	H	2	no growth on auxotrophy plate	+	+	+	0	+	+	++	+
24754	YGR124W	BY4743	07_5	215	H	3	no growth on auxotrophy plate	+	+	0	+	++	+	+	+
24755	YGR125W	BY4743	07_5	215	H	5	no growth on auxotrophy plate	0	+	0	0	+	+	0	+
24756	YGR126W	BY4743	07_5	215	H	6	no growth on auxotrophy plate	+	+	+	+	+++	++	++	++
24757	YGR127W	BY4743	07_5	215	H	7		0	0	0	0	+	+	+	+
24758	YGR128C	BY4743	07_5	215	H	8	no growth on auxotrophy plate	+	+	0	+	++	++	+	++
24759	YGR129W	BY4743	07_5	215	H	9	no growth on auxotrophy plate, slow growth on glycerol plate	+	+	+	+	+	+	+	+
24760	YGR130C	BY4743	07_5	215	H	10	slow growth on glycerol plate	0	+	0	+	+	+	+	++
24761	YGR131W	BY4743	07_5	215	H	11	slow growth on glycerol plate	+	0	+	+	+	0	+	+
24762	YGR132C	BY4743	07_5	215	H	12	no growth on auxotrophy plate, slow growth on glycerol plate	+	+	+	+	++	++	+	+
24763	YGR133W	BY4743	07_5	216	A	1	slow growth on glycerol plate	0	+	0	+	+	+	+	+
24765	YGR135W	BY4743	07_5	216	A	2		0	0	0	+	+	+	+	+
24766	YGR136W	BY4743	07_5	216	A	3		+	0	+	+	++	++	++	++
24767	YGR137W	BY4743	07_5	216	A	4		0	0	+	0	+	+	++	+
24768	YGR138C	BY4743	07_5	216	A	5	no growth on auxotrophy plate	0	0	0	0	+	+	+	+
24769	YGR139W	BY4743	07_5	216	A	6		0	+	+	+	+	+	+	+
24770	YGR140W	BY4743	07_5	216	A	7		+	+	0	0	+	+	+	++
24771	YGR141W	BY4743	07_5	216	A	8		+	+	0	+	+	+	+	+++
24772	YGR142W	BY4743	07_5	216	A	9		+	+	0	+	0	+	+	++
24773	YGR143W	BY4743	07_5	216	A	10		+	+	+	0	+	+	+	+
24774	YGR144W	BY4743	07_5	216	A	11		+	0	0	0	0	+	+	+
24776	YGR146C	BY4743	07_5	216	A	12		+	0	+	+	+	+	+	+
24777	YGR147C	BY4743	07_5	216	B	1	no growth on auxotrophy plate	+	+	+	+	+	+	+	+
24778	YGR148C	BY4743	07_5	216	B	2		+	+	0	0	+	+	+	+
24779	YGR149W	BY4743	07_5	216	B	3		0	+	+	0	+	+	+	+
24780	YGR150C	BY4743	07_5	216	B	5		0	0	+	+	+++	++	+++	++++
24781	YGR151C	BY4743	07_5	216	B	6		+	0	+	+	0	0	+	+
24782	YGR152C	BY4743	07_5	216	B	7		+	+	+	+	++	+	+	++
24783	YGR153W	BY4743	07_5	216	B	8		+	+	+	0	++	+++	++	+++
24784	YGR154C	BY4743	07_5	216	B	9		+	+	0	+	+	+	+	+
24785	YGR155W	BY4743	07_5	216	B	10		+	+	0	0	0	+	0	+
24786	YGR156W	BY4743	07_5	216	B	11		+	+	0	+	+	+	+	+
24787	YGR157W	BY4743	07_5	216	B	12		0	+	+	+	++	++	++	+++
24788	YGR158C	BY4743	07_5	216	C	1		0	0	0	+	0	+	+	+
24789	YGR159C	BY4743	07_5	216	C	2		0	0	+	+	++	++	++++	+++
24790	YGR160W	BY4743	07_5	216	C	3		0	+	+	0	+	0	+	+
24791	YGR161C	BY4743	07_5	216	C	4		+	0	0	0	+	+	+	+
24793	YGR163W	BY4743	07_5	216	C	5		0	+	+	+	0	+	0	+
24794	YGR164W	BY4743	07_5	216	C	6		+	+	+	0	+	+	++	++
24795	YGR165W	BY4743	07_5	216	C	7		+	0	0	+	+	+	+	+
24796	YGR166W	BY4743	07_5	216	C	8		++	+	+	+	0	0	0	+
24797	YGR167W	BY4743	07_5	216	C	9		+	0	+	+	+	+	+	+
24798	YGR168C	BY4743	07_5	216	C	10		+	0	+	0	++	+++	++	++++
24799	YGR169C	BY4743	07_5	216	C	11		0	+	+	0	0	+	+	+
24800	YGR170W	BY4743	07_5	216	C	12		+	+	0	0	0	+	+	+
24801	YGR171C	BY4743	07_5	216	D	1		0	+	0	+	++	+	+	+
24802	YGR172C	BY4743	07_5	216	D	2		0	+	+	+	+	+	+	+
24803	YGR173W	BY4743	07_5	216	D	3		+	0	+	+	+	+	+	+
24804	YGR174C	BY4743	07_5	216	D	4		0	+	+	0	+	0	0	+
24805	YGR175C	BY4743	07_5	216	D	5		0	+	+	+	+	0	+	+
24806	YGR176W	BY4743	07_5	216	D	6		+	0	0	+	++	0	+	++
24807	YGR177C	BY4743	07_5	216	D	7		+	0	+	+	+	0	+	+
24808	YGR178C	BY4743	07_5	216	D	8		+	+	0	+	0	+	+	+
24809	YGR179C	BY4743	07_5	216	D	9		+	0	0	0	+	+	+	++
24810	YGR180C	BY4743	07_5	216	D	10		++	+++	+	+	+	+	+	+
24811	YGR181W	BY4743	07_5	216	D	11		0	+	+	+	+	+	+	+
24812	YGR182C	BY4743	07_5	216	D	12		0	0	0	0	0	+	0	+
24813	YGR183C	BY4743	07_5	216	E	1		0	+	+	0	0	+	+	+
24814	YGR184C	BY4743	07_5	216	E	2		+	0	0	0	0	+	+	+
24815	YGR185C	BY4743	07_5	216	E	3		0	0	+	+	+	+	+	+
24817	YGR187C	BY4743	07_5	216	E	4		+	0	0	0	+	+	+	+
24819	YGR189C	BY4743	07_5	216	E	5		+	0	+	+	++++	+	+++	+++
24820	YGR190C	BY4743	07_5	216	E	6		0	0	+	+	0	0	+	+
24821	YGR191W	BY4743	07_5	216	E	7		+	+	+	0	+	+	+	+
24822	YGR192C	BY4743	07_5	216	E	8		0	0	0	+	0	+	+	+
24823	YGR193C	BY4743	07_5	216	E	9		+	+	0	0	++	+++	+++	++++
24824	YGR194C	BY4743	07_5	216	E	10		+	+	+	+	+	+++	++	++
24825	YGR195W	BY4743	07_5	216	E	11		0	+	0	+	++	++	++	+++
24826	YGR196C	BY4743	07_5	216	E	12		0	+	0	0	++	++	++	++
24827	YGR197C	BY4743	07_5	216	F	1		+	+	+	+	++	++	+	++
24830	YGR200C	BY4743	07_5	216	F	2		+	0	+	0	+	+	+	+
24832	YGR202C	BY4743	07_5	216	F	3		+	+	+	+	+	0	+	+
24833	YGR203W	BY4743	07_5	216	F	4		+	+	+	+	+	+	+	+
24835	YGR205W	BY4743	07_5	216	F	5		0	+	+	+	+	+	+	+
24837	YGR207C	BY4743	07_5	216	F	6	slow growth on auxotrophy plate	+	0	+	+	++	+	++	++
24838	YGR208W	BY4743	07_5	216	F	7	slow growth on auxotrophy plate	0	+	0	+	+	+	+	+
24839	YGR209C	BY4743	07_5	216	F	8		+	+	+	+	+	0	+	++
24841	YGR211W	BY4743	07_5	216	F	9		0	0	+	+	0	0	+	+
24842	YGR212W	BY4743	07_5	216	F	10		0	0	0	0	++	++++	++++	++++
24843	YGR213C	BY4743	07_5	216	F	11		0	0	+	0	+	++	++	++
24844	YGR214W	BY4743	07_5	216	F	12		+	0	0	0	+	0	+	+
24845	YGR215W	BY4743	07_5	216	G	1		+	0	+	0	0	0	+	+
24846	YGR216C	BY4743	07_5	216	G	2	no growth on auxotrophy plate, no growth on glycerol plate	0	+	+	+	0	+	+	+
24847	YGR217W	BY4743	07_5	216	G	3	slow growth on glycerol plate	+	0	+	+	+	+	+	+
24848	YGR218W	BY4743	07_5	216	G	4	slow growth on glycerol plate	+	+	+	+	0	+	+	+
20916	YHL047C	BY4743	08_1	216	G	5		0	0	+	+	++	+	+	+
20917	YHL046C	BY4743	08_1	216	G	6		+	0	+	0	+	+	+	+
20918	YHL045W	BY4743	08_1	216	G	7		0	+	0	+	+	+	+	+
20919	YHL044W	BY4743	08_1	216	G	8	no growth on auxotrophy plate, no growth on glycerol plate	0	+	0	0	+	+	+	+
20920	YHL043W	BY4743	08_1	216	G	9		+	0	+	+	+	+	++	++
20921	YHL042W	BY4743	08_1	216	G	10		+	0	+	+	0	0	+	+
20922	YHL041W	BY4743	08_1	216	G	11	no growth on auxotrophy plate	0	+	0	+	+	+	+	++
20925	YHL038C	BY4743	08_1	216	G	12		0	+	0	0	+	+	+	+
20926	YHL037C	BY4743	08_1	216	H	1		+	+	+	+	+	+	+	+
20927	YHL036W	BY4743	08_1	216	H	2		+	+	+	+	+	+	++	+
20928	YHL035C	BY4743	08_1	216	H	3	very slow growth on auxotrophy plate	+	+	0	+	+	+	+	+
20929	YHL034C	BY4743	08_1	216	H	5		0	+	+	0	+	+	++	++
20930	YHL033C	BY4743	08_1	216	H	6		0	+	+	+	+	+	+	+
20931	YHL032C	BY4743	08_1	216	H	7	slow growth on auxotrophy plate, slow growth on glycerol plate	+	+	+	0	+	+	+	+
20932	YHL031C	BY4743	08_1	216	H	8	slow growth on auxotrophy plate	0	+	0	0	0	+	+	++
20933	YHL030W	BY4743	08_1	216	H	9	slow growth on YPD+418, slow growth on auxotrophy plate, slow growth on glycerol plate	0	+	0	0	+	+	+	++
20934	YHL029C	BY4743	08_1	216	H	10		0	0	0	+	++	++	++	++
20935	YHL028W	BY4743	08_1	216	H	11	slow growth on YPD+418, slow growth on auxotrophy plate, no growth on glycerol plate	0	0	+	0	++++	++++	++++	+++
20936	YHL027W	BY4743	08_1	216	H	12	very slow growth on auxotrophy plate	+	+	+	+	+	+	+	+
20937	YHL026C	BY4743	08_1	217	A	1		+	0	+	+	+	0	0	+
20940	YHL023C	BY4743	08_1	217	A	2		0	0	0	0	+	0	+	++
20941	YHL022C	BY4743	08_1	217	A	3		0	0	+	+	+	+	+	++
20942	YHL021C	BY4743	08_1	217	A	4		0	+	0	+	+	+	+	+
20943	YHL020C	BY4743	08_1	217	A	5		0	0	0	0	++	+	+	++
20944	YHL019C	BY4743	08_1	217	A	6		+	0	+	+	+	+	+	+
20946	YHL017W	BY4743	08_1	217	A	7	slow growth on auxorophy plate, slow growth on glycerol plate	+	0	+	0	+	+	+	+
20947	YHL016C	BY4743	08_1	217	A	8	very slow growth on auxotrophy plate	0	0	+	+	+	+	+	+
20948	YHL015W	BY4743	08_1	217	A	9	slow growth on auxorophy plate	+	+	+	+	+	0	+	+
20949	YHL014C	BY4743	08_1	217	A	10		0	0	0	0	+	+	++	++
20950	YHL013C	BY4743	08_1	217	A	11		0	0	+	0	+	0	+	+
20951	YHL012W	BY4743	08_1	217	A	12		+	+	+	+	+	+	+	+
20953	YHL010C	BY4743	08_1	217	B	1		+	0	+	+	+	+	+	+
20954	YHL009C	BY4743	08_1	217	B	2		0	0	0	0	+	+	+	+
20955	YHL008C	BY4743	08_1	217	B	3		0	0	0	+	0	0	+	+
20956	YHL007C	BY4743	08_1	217	B	4		+	0	0	0	0	0	+	+
20957	YHL006C	BY4743	08_1	217	B	6		0	+	0	+	+	0	+	+
20959	YHL005C	BY4743	08_1	217	B	7		+	0	0	+	0	+	+	+
20960	YHL003C	BY4743	08_1	217	B	8	slow growth on auxorophy plate	+	+	+	+	0	+	+	+
20964	YHR001W-A	BY4743	08_1	217	B	9		0	0	+	+	+	+	+	+
20973	YHR010W	BY4743	08_1	217	B	10		+	+	+	+	+	+	+	+
20974	YHR011W	BY4743	08_1	217	B	11		+	0	0	+	++	++	++	++
20975	YHR012W	BY4743	08_1	217	B	12	very slow growth on auxotrophy plate	+	0	+	+	0	+	+	+
20976	YHR013C	BY4743	08_1	217	C	1		0	0	+	0	+	+	++	++
20977	YHR014W	BY4743	08_1	217	C	2		0	0	+	+	+	+	+	+
20978	YHR015W	BY4743	08_1	217	C	3		0	0	+	+	+	0	+	+
20981	YHR018C	BY4743	08_1	217	C	4		+	0	+	0	0	+	+	+
20982	YHR019C	BY4743	08_1	217	C	5		0	+	+	+	+	+	+	+
20983	YHR020W	BY4743	08_1	217	C	6		0	0	+	+	+	+	+++	+
20984	YHR021C	BY4743	08_1	217	C	7		+	0	+	0	++++	++	++++	++++
20985	YHR022C	BY4743	08_1	217	C	8		0	+	+	0	+++	++	+++	+++
20987	YHR024C	BY4743	08_1	217	C	9		+	0	+	+	+	+	+	+
20991	YHR028C	BY4743	08_1	217	C	10		0	+	+	0	+	0	+	++
20992	YHR029C	BY4743	08_1	217	C	11		0	0	+	+	++++	++++	++++	++++
20993	YHR030C	BY4743	08_1	217	C	12		+	0	0	0	0	+	+	0
20994	YHR031C	BY4743	08_1	217	D	1		0	+	+	+	+	+	+	+
20996	YHR033W	BY4743	08_1	217	D	2	very slow growth on auxotrophy plate	+	0	0	+	0	0	+	+
20997	YHR034C	BY4743	08_1	217	D	3		+	0	+	+	+	0	+	+
20998	YHR035W	BY4743	08_1	217	D	4		0	0	+	+	0	0	+	+
20999	YHR036W	BY4743	08_1	217	D	5		+	0	+	+	+	+	+	+
21000	YHR037W	BY4743	08_1	217	D	6		0	0	+	+	+	+	+	+
21001	YHR038W	BY4743	08_1	217	D	7		0	0	+	+	0	+	+	+
21002	YHR039C	BY4743	08_1	217	D	8		0	+	+	+	+	+	+	+
21003	YHR040W	BY4743	08_1	217	D	9		0	0	0	0	+	0	+	+
21005	YHR042W	BY4743	08_1	217	D	10		+	0	+	+	+	+	+	+
21006	YHR043C	BY4743	08_1	217	D	11		+	+	0	0	0	+	+	+
21007	YHR044C	BY4743	08_1	217	D	12		0	0	+	0	+	+	+	+
21873	YHR046C	BY4743	08_2	217	E	1		0	+	+	+	+	+	+	+
21874	YHR047C	BY4743	08_2	217	E	2		+	+	+	+	0	0	+	+
21875	YHR048W	BY4743	08_2	217	E	3		0	0	+	+	+	+	+	+
21876	YHR049W	BY4743	08_2	217	E	4		0	0	+	+	+	+	++	+
21877	YHR049C-A	BY4743	08_2	217	E	5		0	+	+	+	0	0	+	+
21878	YHR050W	BY4743	08_2	217	E	6		+	+	+	+	+	+	++	+
21879	YHR051W	BY4743	08_2	217	E	7		+	0	0	+	+	0	+	+
21885	YHR057C	BY4743	08_2	217	E	8		++	++	+	+	0	+	+	+
21888	YHR060W	BY4743	08_2	217	E	9	slow growth on auxotrophy plate	+	0	0	0	0	0	+	+
21889	YHR061C	BY4743	08_2	217	E	10		+	+	+	+	+	+	+	+
21890	YHR062C	BY4743	08_2	217	E	11		+	0	0	+	0	+	+	+
21893	YHR065C	BY4743	08_2	217	E	12	very slow growth on auxotrophy plate	0	0	+	0	+	+	+	+
21894	YHR066W	BY4743	08_2	217	F	1		0	0	0	0	++	+	+++	++
21896	YHR068W	BY4743	08_2	217	F	2		0	+	0	+	+	0	+	+
21897	YHR069C	BY4743	08_2	217	F	3		+	+	+	+	+	+	+	++
21898	YHR070W	BY4743	08_2	217	F	4	slow growth on YPD+G418, no growth auxotrophy plate, no growth glycerol plate	0	0	+	+	0	+	+	+
21900	YHR072W	BY4743	08_2	217	F	5		0	0	+	+	+++	+++	++++	++++
21901	YHR073W	BY4743	08_2	217	F	6		+	0	+	+	+	+	+	+
21902	YHR074W	BY4743	08_2	217	F	7		+	+	0	0	+	+	+	+
21903	YHR075C	BY4743	08_2	217	F	8		+	+	+	+	0	+	+	+
21904	YHR076W	BY4743	08_2	217	F	9		+	+	0	+	+	++	+++	+++
21905	YHR077C	BY4743	08_2	217	F	10		+	0	+	+	+	0	+	+
21906	YHR078W	BY4743	08_2	217	F	11		+	0	+	+	+	+	+	+
21908	YHR080C	BY4743	08_2	217	F	12		0	+	+	+	0	0	+	+
21909	YHR081W	BY4743	08_2	217	G	1		+	0	0	0	+	0	+	+
21910	YHR082C	BY4743	08_2	217	G	2		0	+	+	+	0	0	+	+
21911	YHR083W	BY4743	08_2	217	G	3		+	0	0	0	+	+	+	+
21912	YHR084W	BY4743	08_2	217	G	4		0	0	+	+	+	0	++	++
21913	YHR085W	BY4743	08_2	217	G	5		0	0	0	+	0	0	+	+
21914	YHR086W	BY4743	08_2	217	G	6		+	0	+	+	+	+	+	+
21915	YHR087W	BY4743	08_2	217	G	7		+	+	+	0	+	0	++	+
21916	YHR088W	BY4743	08_2	217	G	8		0	+	+	0	+	+	+++	+++
21919	YHR091C	BY4743	08_2	217	G	9		+	+	+	+	0	0	+	+
21920	YHR092C	BY4743	08_2	217	G	10		+	+	+	+	+	0	+	0
21921	YHR093W	BY4743	08_2	217	G	11	slow growth on YPD+G418, slow growth on glycerol plate	+	+	+	+	0	+	+	+
21922	YHR094C	BY4743	08_2	217	G	12		0	+	+	+	+	+	0	+
21923	YHR095W	BY4743	08_2	217	H	1		+	0	+	+	+	0	+	++
21924	YHR096C	BY4743	08_2	217	H	2		0	0	+	+	+	+	+	+
21925	YHR097C	BY4743	08_2	217	H	3		+	+	+	+	+	+	++	+
21928	YHR100C	BY4743	08_2	217	H	5		0	+	+	+	+	+	+	+
21929	YHR101C	BY4743	08_2	217	H	6		+	0	+	+	+	+	+	+
21931	YHR103W	BY4743	08_2	217	H	7		+	+	0	+	+	+	+	+
21932	YHR104W	BY4743	08_2	217	H	8		0	0	+	0	+	0	++	+
21933	YHR105W	BY4743	08_2	217	H	9		+	+	+	+	+	+	+	+
21934	YHR106W	BY4743	08_2	217	H	10	slow growth on glycerol plate	+	+	0	+	+	+	+	+
21935	YHR107C	BY4743	08_2	217	H	11		+	+	0	+	+	+	+	+
21936	YHR108W	BY4743	08_2	217	H	12		+	+	+	0	+	++	+	+
21937	YHR109W	BY4743	08_2	218	A	1		0	+	+	0	++	++	++	+
21938	YHR110W	BY4743	08_2	218	A	2		+	+	+	+	++++	++++	+++	++
21939	YHR111W	BY4743	08_2	218	A	3		0	0	+	+	++	++	++	+
21940	YHR112C	BY4743	08_2	218	A	4		+	+	+	0	0	+	0	+
21941	YHR113W	BY4743	08_2	218	A	5		0	+	0	0	+	+	+	+
21942	YHR114W	BY4743	08_2	218	A	6		0	+	0	+	+	+	+	+
21943	YHR115C	BY4743	08_2	218	A	7		0	0	0	+	+	+	+	+
21944	YHR116W	BY4743	08_2	218	A	8		+	+	+	+	+	+	+	+
21945	YHR117W	BY4743	08_2	218	A	9		0	+	+	+	++++	++++	++++	+++
21946	YHR118C	BY4743	08_2	218	A	10		+	0	+	+	+	+	+	+
21948	YHR120W	BY4743	08_2	218	A	11		+	0	+	0	+	0	+	+
21949	YHR121W	BY4743	08_2	218	A	12		+	0	0	0	+	+	+	+
21950	YHR122W	BY4743	08_2	218	B	1		0	+	+	+	+	+	+	+
21951	YHR123W	BY4743	08_2	218	B	2		+	0	+	0	++++	++++	++	++
21952	YHR124W	BY4743	08_2	218	B	3	slow growth on YPD+G418, no growth auxotrophy plate, no growth glycerol plate	0	+	+	+	+++	+++	+	+
21953	YHR125W	BY4743	08_2	218	B	4		+	0	+	0	+	+	+	+
21957	YHR129C	BY4743	08_2	218	B	5		0	+	0	+	++	++	++	+
21958	YHR130C	BY4743	08_2	218	B	7		+	+	+	0	0	+	+	+
21960	YHR132C	BY4743	08_2	218	B	8		0	0	+	0	+	++	+	+
21961	YHR133C	BY4743	08_2	218	B	9		0	0	+	0	++	++	++	++
21962	YHR134W	BY4743	08_2	218	B	10		+	0	+	0	++++	++++	++	+++
21963	YHR135C	BY4743	08_2	218	B	11		0	+	+	0	+	++	+	+
21964	YHR136C	BY4743	08_2	218	B	12	slow growth on glycerol plate	0	+	+	+	0	+	+	+
21965	YHR137W	BY4743	08_2	218	C	1		0	+	+	+	0	+	+	+
21966	YHR138C	BY4743	08_2	218	C	2	slow growth on YPD+G418, no growth auxotrophy plate, no growth glycerol plate	+	+	+	0	+	+	+	+
21967	YHR139C	BY4743	08_2	218	C	3	slow growth on glycerol plate	+	0	0	0	+	++	+	+
22835	YHR142W	BY4743	08_3	218	C	4		0	0	+	+	+	+	+	+
22836	YHR143W	BY4743	08_3	218	C	5		0	+	+	0	+	+	+	0
22837	YHR143W-A	BY4743	08_3	218	C	6		0	+	0	+	+	+	+	+
22841	YHR147C	BY4743	08_3	218	C	7	no growth auxotrophy plate, no growth glycerol plate	0	0	+	0	+	+	++	+
22844	YHR150W	BY4743	08_3	218	C	8		+	0	+	+	++	++	+++	+++
22845	YHR151C	BY4743	08_3	218	C	9		+	+	0	+	+++	++++	+++	+++
22846	YHR152W	BY4743	08_3	218	C	10		+	+	+	+	+	+	+	+
22847	YHR153C	BY4743	08_3	218	C	11		0	0	0	+	+	+	+	+
22848	YHR154W	BY4743	08_3	218	C	12		+	0	+	0	+	++	+	++
22849	YHR155W	BY4743	08_3	218	D	1		0	+	0	0	+	+++	++	+
22850	YHR156C	BY4743	08_3	218	D	2		0	0	+	0	+	+	+	+
22851	YHR157W	BY4743	08_3	218	D	3		+	+	+	+	0	0	+	+
22852	YHR158C	BY4743	08_3	218	D	4		0	+	+	+	+	+	+	+
22853	YHR159W	BY4743	08_3	218	D	5		+	0	0	+	++	+	++	++
22855	YHR161C	BY4743	08_3	218	D	6	slow growth on YPD+G418, no growth auxotrophy plate, no growth glycerol plate	+++	+++	++	++	+	+	0	0
22857	YHR163W	BY4743	08_3	218	D	7		+	0	0	+	++	++	+	++
22858	YHR164C	BY4743	08_3	218	D	8		+	+	+	0	+	+	+	+
22860	YHR166C	BY4743	08_3	218	D	9		+	0	+	0	0	+	+	+
22861	YHR167W	BY4743	08_3	218	D	10		+	0	+	+	++	+++	++	+++
22866	YHR172W	BY4743	08_3	218	D	11		0	0	+	+	+	+	+	+
22870	YHR176W	BY4743	08_3	218	D	12		0	+	0	0	+	+	+	+
22871	YHR177W	BY4743	08_3	218	E	1		+	+	+	+	+	+	+	+
22872	YHR178W	BY4743	08_3	218	E	2		+	0	0	+	+	+	0	+
22873	YHR179W	BY4743	08_3	218	E	3		+	+	0	+	+	+	+	+
22876	YHR182W	BY4743	08_3	218	E	4		+	0	+	0	+	+	+	+
22877	YHR183W	BY4743	08_3	218	E	5		0	+	0	+	+	+	+	+
22878	YHR184W	BY4743	08_3	218	E	6		0	+	+	+	+	++	++	++
22880	YHR186C	BY4743	08_3	218	E	7	slow growth on YPD+G418, slow growth auxotrophy plate, slow growth glycerol plate	0	+	+	+	+	+	+	+
22882	YHR188C	BY4743	08_3	218	E	8		0	0	0	+	+	++	+	+
22883	YHR189W	BY4743	08_3	218	E	9		+	+	+	0	+	+	++	+
22884	YHR190W	BY4743	08_3	218	E	10		0	0	+	+	+	+	+	+
22892	YHR198C	BY4743	08_3	218	E	11		0	0	0	0	++++	+++	+++	+++
22893	YHR199C	BY4743	08_3	218	E	12		+	+	+	+	+	+	+	+
22894	YHR200W	BY4743	08_3	218	F	1		0	+	+	0	++	+	++	++
22896	YHR202W	BY4743	08_3	218	F	2		+	+	+	+	+	+	+	+
22897	YHR203C	BY4743	08_3	218	F	3		+	+	+	0	+	+	++	++
22898	YHR204W	BY4743	08_3	218	F	4		+	0	0	+	+++	+++	++	+
22900	YHR206W	BY4743	08_3	218	F	5		0	0	+	0	+	++	+	+
22903	YHR209W	BY4743	08_3	218	F	6	no growth	ND*	ND*	ND*	ND*	ND*	ND*	ND*	ND*
22904	YHR210C	BY4743	08_3	218	F	7		+	+	+	0	++	+++	+++	+++
23409	YCL001W	BY4743	03_1	218	F	8		0	+	0	0	0	+	+	+
23410	YCL002C	BY4743	03_1	218	F	9		0	+	+	+	+	+	+	+
23411	YCL003W	BY4743	03_1	218	F	10		0	+	0	0	0	+	+	+
23412	YCL004W	BY4743	03_1	218	F	11		0	+	+	0	++	++	++	++
23413	YCL005W	BY4743	03_1	218	F	12		+	0	0	+	++++	+++	++++	++++
23415	YCL007C	BY4743	03_1	218	G	1		0	0	+	+	+	+	+	+
23416	YCL008C	BY4743	03_1	218	G	2		+	0	+	+	+	+	+	+
23417	YCL009C	BY4743	03_1	218	G	3		0	+	+	+	+	+	+	+
23418	YCL010C	BY4743	03_1	218	G	4		0	0	+	+	++	++	++	++
23419	YCL011C	BY4743	03_1	218	G	5		+	+	+	0	0	0	+	+
23420	YCL012W	BY4743	03_1	218	G	6		0	0	0	+	+++	+++	+++	+++
23421	YCL013W	BY4743	03_1	218	G	7		+	+	+	+	+	++	++	++
23422	YCL014W	BY4743	03_1	218	G	8		+	0	+	0	+	+	+	+
23423	YCL016C	BY4743	03_1	218	G	9		0	+	+	0	0	+	+	+
23424	YCL017C	BY4743	03_1	218	G	10		+	+	+	+	+	+	++	+
23431	YCL024W	BY4743	03_1	218	G	11		+	0	+	0	++	++	++	++
23432	YCL025C	BY4743	03_1	218	G	12		+	+	+	0	+	+	+	++
23433	YCL026C	BY4743	03_1	218	H	1	no growth on auxotrophy plate	0	+	0	+	+	+	+	+
23434	YCL027W	BY4743	03_1	218	H	2		0	+	+	+	+	+	+	+
23435	YCL028W	BY4743	03_1	218	H	3		+	+	+	+	+	0	0	+
23436	YCL029C	BY4743	03_1	218	H	5		0	0	+	+	+	++	+	+
23437	YCL030C	BY4743	03_1	218	H	6		+	0	+	+	++	++	++	++
23438	YCL031C	BY4743	03_1	218	H	7		0	+	+	+	+	+	+	++
23439	YCL032W	BY4743	03_1	218	H	8		0	+	+	+	+	+	++	+
23440	YCL033C	BY4743	03_1	218	H	9		0	+	+	+	+	0	+	+
23441	YCL034W	BY4743	03_1	218	H	10	no growth on auxotrophy plate	+	0	+	+	+	0	+	+
23443	YCL036W	BY4743	03_1	218	H	11		0	+	+	+	+	+	++	++
23444	YCL037C	BY4743	03_1	218	H	12		+	+	+	0	+	+	+	+
23446	YCL039W	BY4743	03_1	219	A	1		+	0	+	+	0	+	+	+
23447	YCL040W	BY4743	03_1	219	A	2		0	0	+	+	0	0	+	+
23448	YCL041C	BY4743	03_1	219	A	3	no growth on auxotrophy plate	0	0	+	0	0	+	+	+
23449	YCL042W	BY4743	03_1	219	A	4		0	0	+	+	+	+	+	+
23450	YCL043C	BY4743	03_1	219	A	5		0	0	+	0	0	0	+	0
23451	YCL044C	BY4743	03_1	219	A	6		+	+	+	+	+	+	+	+
23452	YCL045C	BY4743	03_1	219	A	7		+	0	+	+	+	0	+	+
23453	YCL046W	BY4743	03_1	219	A	8		+	+	+	+	+	+	++	++
23454	YCL047C	BY4743	03_1	219	A	9		+	0	+	+	+	+	+	+
23455	YCL048W	BY4743	03_1	219	A	10		0	0	+	+	+	+	+	++
23456	YCL049C	BY4743	03_1	219	A	11		+	0	+	+	+	+	+	+
23457	YCL050C	BY4743	03_1	219	A	12	no growth on auxotrophy plate	0	0	+	+	+	+	+	+
23458	YCLO51W	BY4743	03_1	219	B	1		0	0	0	+	0	+	+	+
23459	YCL052C	BY4743	03_1	219	B	2		+	+	+	+	+	++	+	++
23461	YCL054W	BY4743	03_1	219	B	3		+	+	+	+	+	+	+	+
23462	YCL055W	BY4743	03_1	219	B	4		0	0	0	+	0	0	+	0
23463	YCL056C	BY4743	03_1	219	B	5		0	0	0	+	0	0	+	+
23464	YCL057W	BY4743	03_1	219	B	6		+	0	+	+	+	+	+	+
23467	YCL060C	BY4743	03_1	219	B	8		+	0	+	+	++	+	+	+
23468	YCL061C	BY4743	03_1	219	B	9		0	0	+	+	++	++	++	++
23469	YCL062W	BY4743	03_1	219	B	10		+	+	+	+	0	0	+	+
23470	YCL063W	BY4743	03_1	219	B	11		+	+	+	+	+	+	+	+
23471	YCL064C	BY4743	03_1	219	B	12		0	0	0	+	+	0	+	+
23476	YCL069W	BY4743	03_1	219	C	1		+	+	+	0	+	+	++	+
23481	YCR001W	BY4743	03_1	219	C	2		+	+	+	+	+	+	+	++
23482	YCR002C	BY4743	03_1	219	C	3		+	0	+	+	0	+	+	+
23483	YCR003W	BY4743	03_1	219	C	4		+	+	+	+	0	+	+	+
23484	YCR004C	BY4743	03_1	219	C	5		0	+	+	+	+	+	+	++
23485	YCR005C	BY4743	03_1	219	C	6		0	0	+	+	0	0	+	+
23486	YCR006C	BY4743	03_1	219	C	7		0	0	+	+	+	+	+	++
23487	YCR007C	BY4743	03_1	219	C	8		0	0	+	+	++	+	+++	+++
23488	YCR008W	BY4743	03_1	219	C	9		+	+	+	+	+	+	+	+
23489	YCR009C	BY4743	03_1	219	C	10		+	0	+	+	0	+	+	0
23490	YCR010C	BY4743	03_1	219	C	11		0	0	+	+	++	+	+++	+++
23491	YCR011C	BY4743	03_1	219	C	12		0	0	0	+	0	+	+	+
23492	YCR012W	BY4743	03_1	219	D	1		+	+	+	0	+	+	+	+
23493	YCR013C	BY4743	03_1	219	D	2		+	+	+	+	+	+	+	+
23494	YCR014C	BY4743	03_1	219	D	3		+	+	+	+	0	+	0	+
23495	YCR015C	BY4743	03_1	219	D	4	no growth on auxotrophy plate	0	0	+	+	0	0	+	+
23496	YCR016W	BY4743	03_1	219	D	5		0	0	+	0	0	+	+	+
23497	YCR017C	BY4743	03_1	219	D	6		+	+	+	+	+	++	+	+
23499	YCR019W	BY4743	03_1	219	D	7		+	+	+	0	0	0	+	+
23500	YCR020C	BY4743	03_1	219	D	8		+	+	+	+	0	0	+	+
23501	YCR020C-A	BY4743	03_1	219	D	9		0	0	+	+	0	+	+	+
23502	YCR021C	BY4743	03_1	219	D	10		+	0	+	+	0	0	+	+
23503	YCR022C	BY4743	03_1	219	D	11		0	0	+	0	+	0	+	+
23504	YCR023C	BY4743	03_1	219	D	12		0	0	+	0	+	+	++	+
24081	YLR420W	BY4743	12_3	219	E	1		+	0	+	0	0	+	+	+
24082	YLR451W	BY4743	12_3	219	E	2		0	+	0	+	+	+	+	+
24083	YLR126C	BY4743	12_3	219	E	3		+	0	+	+	+	+	++	++
24084	YLR127C	BY4743	12_3	219	E	4		+	+	0	+	0	+	+	+
24085	YLR128W	BY4743	12_3	219	E	5		0	+	+	+	0	+	+	+
24086	YLR129W	BY4743	12_3	219	E	6		0	+	0	+	+	+	++	+
24087	YLR130C	BY4743	12_3	219	E	7		+	+	+	+	+	+	++	++
24088	YLR131C	BY4743	12_3	219	E	8		+	0	+	+	+	+	+	+
24089	YLR132C	BY4743	12_3	219	E	9		0	+	+	+	0	0	+	+
24090	YLR133W	BY4743	12_3	219	E	10		+	0	+	+	++	+	+++	++
24091	YLR134W	BY4743	12_3	219	E	11		0	+	+	+	+	+	+	+
24092	YLR135W	BY4743	12_3	219	E	12		0	+	+	+	0	0	+	+
24093	YLR136C	BY4743	12_3	219	F	1		0	0	+	+	+	0	+	+
24094	YLR137W	BY4743	12_3	219	F	2		++	++	+	+	0	0	+	+
24095	YLR138W	BY4743	12_3	219	F	3		+	+	+	+	+	+	+	+
24096	YLR139C	BY4743	12_3	219	F	4		+	0	+	+	+	0	+	+
24097	YLR140W	BY4743	12_3	219	F	5		+	0	+	+	+	+	+	++
24098	YLR141W	BY4743	12_3	219	F	6		0	0	+	+	+	+	+	+
24099	YLR142W	BY4743	12_3	219	F	7		+	+	+	+	+	+	+	+
24100	YLR143W	BY4743	12_3	219	F	8		+	0	+	+	0	+	+	++
24101	YLR144C	BY4743	12_3	219	F	9		0	+	+	+	+	+	++	+++
24102	YLR145W	BY4743	12_3	219	F	10		+	+	0	+	0	+	+	+
24104	YLR147C	BY4743	12_3	219	F	11		+	+	+	+	+	+	+	+
24105	YLR148W	BY4743	12_3	219	F	12		+	+	+	+	0	0	+	+
24106	YLR149C	BY4743	12_3	219	G	1		0	0	+	+	+	0	+	+
24107	YLR150W	BY4743	12_3	219	G	2		0	0	+	+	+	0	+	+
24108	YLR151C	BY4743	12_3	219	G	3		+	+	+	+	+	+	+	+
24109	YLR152C	BY4743	12_3	219	G	4		+	0	+	+	+	+	+	+
24111	YLR154C	BY4743	12_3	219	G	5		0	+	+	+	+	0	+	+
24112	YLR163C	BY4743	12_3	219	G	6		+	+	+	0	+	++	++	++
24113	YLR164W	BY4743	12_3	219	G	7		+	+	+	+	+	+	+	++
24114	YLR165C	BY4743	12_3	219	G	8		+	0	+	+	+	+	+	++
24115	YLR166C	BY4743	12_3	219	G	9		+	+	+	+	+	+	++	++
24116	YLR167W	BY4743	12_3	219	G	10		+	+	+	+	+	+	+	+
24117	YLR168C	BY4743	12_3	219	G	11		0	0	+	+	0	0	+	++
24118	YLR169W	BY4743	12_3	219	G	12		+	+	+	+	++	+	++	++
24119	YLR170C	BY4743	12_3	219	H	1		0	+	+	+	+	+	+	+
24120	YLR171W	BY4743	12_3	219	H	2		+	+	+	0	+	+	+	+
24121	YLR172C	BY4743	12_3	219	H	3		+	0	+	+	+	+	+	+
24122	YLR173W	BY4743	12_3	219	H	5		+	+	+	+	+	+	+	+
24123	YLR174W	BY4743	12_3	219	H	6		+	+	+	+	+	+	+	+
24124	YLR175W	BY4743	12_3	219	H	7		+	+	+	+	+	+	+	+
24125	YLR176C	BY4743	12_3	219	H	8		+	0	+	0	+	+	+	++
24126	YLR177W	BY4743	12_3	219	H	9		0	+	+	+	+	+	+	++
24127	YLR178C	BY4743	12_3	219	H	10		0	+	+	0	+	+	++	++
24128	YLR179C	BY4743	12_3	219	H	11		0	+	+	+	+	+	++	+
24129	YLR180W	BY4743	12_3	219	H	12		+	+	+	+	+	+	+	+
24130	YLR181C	BY4743	12_3	220	A	1		++	++	++	+	+	+	+	+
24131	YLR182W	BY4743	12_3	220	A	2		0	0	+	+	+	0	+	+
24132	YLR183C	BY4743	12_3	220	A	3		+	+	+	0	0	+	+	+
24133	YLR184W	BY4743	12_3	220	A	4		+	+	+	+	+	++	++	++
24134	YLR185W	BY4743	12_3	220	A	5		+	+	0	+	+	+	+	+
24135	YLR186W	BY4743	12_3	220	A	6		+	+	+	+	+	+	++	++
24136	YLR187W	BY4743	12_3	220	A	7		+	+	+	+	+	0	+	+
24137	YLR188W	BY4743	12_3	220	A	8		+	+	+	+	+	0	++	++
24138	YLR189C	BY4743	12_3	220	A	9		0	+	+	+	+	0	+	+
24139	YLR190W	BY4743	12_3	220	A	10		0	+	+	+	+	0	+	+
24140	YLR191W	BY4743	12_3	220	A	11		+	+	0	+	+	+	+	+
24142	YLR193C	BY4743	12_3	220	A	12		+	0	+	+	0	+	+	+
24144	YLR195C	BY4743	12_3	220	B	1		+	+	+	+	+	+	+	+
24145	YLR196W	BY4743	12_3	220	B	2		0	+	0	+	+	+	+	+
24146	YLR197W	BY4743	12_3	220	B	3		+	0	+	+	+	+	+	+
24147	YLR198C	BY4743	12_3	220	B	4		+	0	0	+	+	+	0	+
24148	YLR199C	BY4743	12_3	220	B	5		+	0	+	+	+	+	+	+
24149	YLR200W	BY4743	12_3	220	B	6		+	0	+	+	+	+	+	++
24150	YLR201C	BY4743	12_3	220	B	7		+	+	+	+	+	+	+	++
24151	YLR202C	BY4743	12_3	220	B	9		+	+	0	0	++	++	++	+++
24152	YLR203C	BY4743	12_3	220	B	10		+	+	+	0	0	0	+	+
24153	YLR204W	BY4743	12_3	220	B	11		+	+	+	+	+	+	+	+
24154	YLR205C	BY4743	12_3	220	B	12		0	0	0	+	+	+	+	+
24155	YLR206W	BY4743	12_3	220	C	1		+	+	+	+	0	+	+	+
24156	YLR207W	BY4743	12_3	220	C	2		+	0	+	+	+	+	+	++
24157	YLR208W	BY4743	12_3	220	C	3		+	0	+	+	+	+	+	+
24158	YLR209C	BY4743	12_3	220	C	4		0	0	+	+	0	0	+	+
24159	YLR210W	BY4743	12_3	220	C	5		0	+	+	+	+	+	+	+
24160	YLR211C	BY4743	12_3	220	C	6		0	+	+	+	+	+	++	++
24161	YLR212C	BY4743	12_3	220	C	7		+	+	+	+	++	++	++	++
24162	YLR213C	BY4743	12_3	220	C	8		+	+	+	+	+	+	+	+
24163	YLR214W	BY4743	12_3	220	C	9		0	0	+	+	++	++	++	+++
24165	YLR216C	BY4743	12_3	220	C	10		+	+	+	+	+	+	+	+
24166	YLR217W	BY4743	12_3	220	C	11		+	+	+	+	+	+	+	+
24167	YLR218C	BY4743	12_3	220	C	12		+	+	+	+	+	0	0	+
24168	YLR219W	BY4743	12_3	220	D	1		+	+	+	+	0	+	+	+
24169	YLR220W	BY4743	12_3	220	D	2		+	+	+	+	+	+	+	+
24170	YLR221C	BY4743	12_3	220	D	3		0	+	0	0	+	+	+	+
24171	YLR222C	BY4743	12_3	220	D	4		+	+	++	+	+	+	+	+
24172	YLR223C	BY4743	12_3	220	D	5		+	0	0	+	0	+	+	+
24173	YLR224W	BY4743	12_3	220	D	6		0	0	+	+	+	+	++	++
24174	YLR225C	BY4743	12_3	220	D	7		+	+	+	+	+	+	++	++
24175	YLR226W	BY4743	12_3	220	D	8		+	+	+	+	+	+	+	++
24176	YLR227C	BY4743	12_3	220	D	9		+	+	+	++	+	0	+	+++
24849	YKL001C	BY4743	11_1	220	D	10		+	0	+	+	0	+	+	+
24850	YKL002W	BY4743	11_1	220	D	11		+	+	+	+	+	+	+	+
24851	YKL003C	BY4743	11_1	220	D	12		+	+	+	+	+	0	+	+
24852	YKL004W	BY4743	11_1	220	E	1	slow growth on YPD+418, no growth on auxotrophy plate, no growth on glycerol plate	0	0	+	+	0	+	+	+
24854	YKL006C-A	BY4743	11_1	220	E	2		+	0	0	+	+	+	+	+
24855	YKL006W	BY4743	11_1	220	E	3	slow growth on YPD+418, no growth on auxotrophy plate, no growth on glycerol plate	0	0	0	+	0	0	+	+
24856	YKL007W	BY4743	11_1	220	E	4	no gowth on auxotrophy plate, no growth on glycerol plate	0	0	+	+	+	0	+	+
24858	YKL009W	BY4743	11_1	220	E	5	no gowth on auxotrophy plate, no growth on glycerol plate	0	0	+	+	0	0	+	+
24860	YKL011C	BY4743	11_1	220	E	6		+	+	+	+	0	0	+	+
24861	YKL012W	BY4743	11_1	220	E	7		+	+	0	+	+	0	+	+
24862	YKL013C	BY4743	11_1	220	E	8		0	+	+	+	0	+	0	+
24863	YKL014C	BY4743	11_1	220	E	9		0	+	+	+	+	+	+	+
24864	YKL015W	BY4743	11_1	220	E	10		+	0	0	+	0	+	0	+
24865	YKL016C	BY4743	11_1	220	E	11		0	+	+	+	0	+	+	+
24866	YKL017C	BY4743	11_1	220	E	12		0	+	0	+	0	+	+	+
24867	YKL018W	BY4743	11_1	220	F	1	slow growth on YPD+418, no growth on auxotrophy plate, slow growth on glycerol plate	0	+	+	0	+	+	+	+
24868	YKL019W	BY4743	11_1	220	F	2		+	0	+	+	+	++	+	++
24869	YKL020C	BY4743	11_1	220	F	3		+	0	+	+	+	+	+	+
24870	YKL021C	BY4743	11_1	220	F	4		0	0	+	+	+	+	+	++
24871	YKL022C	BY4743	11_1	220	F	5	slow growth on YPD+418, no growth on auxotrophy plate, no growth on glycerol plate	+	+	+	+	+	+	+	+++
24872	YKL023W	BY4743	11_1	220	F	6		+	+	0	+	+	+	+	+
24873	YKL024C	BY4743	11_1	220	F	7		0	0	+	+	+	0	+	++
24874	YKL025C	BY4743	11_1	220	F	8		+	0	+	+	+	+	+	+
24875	YKL026C	BY4743	11_1	220	F	9		+	0	0	+	+	++	++	+++
24876	YKL027W	BY4743	11_1	220	F	10		+	0	+	+	+	+	+	++
24877	YKL028W	BY4743	11_1	220	F	11		+	+	+	+	0	+	+	+
24878	YKL029C	BY4743	11_1	220	F	12		+	+	+	+	+	+	0	++
24880	YKL031W	BY4743	11_1	220	G	1		0	0	0	+	+	0	+	+
24881	YKL032C	BY4743	11_1	220	G	2		0	+	0	+	0	0	+	+
24882	YKL033W	BY4743	11_1	220	G	3		+	+	+	+	+++	++++	+++	++++
24883	YKL034W	BY4743	11_1	220	G	4		+	+	+	+	0	+	+	+
24884	YKL035W	BY4743	11_1	220	G	5		+	+	+	+	0	0	+	+
24885	YKL036W	BY4743	11_1	220	G	6		+	0	+	+	+	+	+	+
24886	YKL037W	BY4743	11_1	220	G	7		+	+	0	+	+	+	+	+
24887	YKL038W	BY4743	11_1	220	G	8		+	+	0	+	+	+	+	+
24888	YKL039W	BY4743	11_1	220	G	9		+	+	+	+	+	0	+	+
24889	YKL040C	BY4743	11_1	220	G	10		0	0	+	+	+	+	+	+
24890	YKL041W	BY4743	11_1	220	G	11		0	+	0	+	+	+	+	+
24891	YKL042W	BY4743	11_1	220	G	12		+	+	+	+	+	+	+	+
24892	YKL043W	BY4743	11_1	220	H	1		+	0	+	+	0	+	+	+
24893	YKL044W	BY4743	11_1	220	H	2		0	0	+	+	+	+	+	++
24894	YKL045W	BY4743	11_1	220	H	3		0	+	+	+	+	0	+	++
24895	YKL046C	BY4743	11_1	220	H	5		+	0	+	+	+	+	+	+
24896	YKL047W	BY4743	11_1	220	H	6		0	+	+	+	++	++	+++	++++
24897	YKL048C	BY4743	11_1	220	H	7		+	+	+	+	+	+	+	+
24898	YKL049C	BY4743	11_1	220	H	8		+	0	+	+	+	0	+	+
24899	YKL050C	BY4743	11_1	220	H	9		+	+	+	+	+	+	+	+
24900	YKL051W	BY4743	11_1	220	H	10		+	+	+	+	+	+	+	++
24901	YKL052C	BY4743	11_1	220	H	11		+	0	+	+	++	++	++	+++
24902	YKL053W	BY4743	11_1	220	H	12		+	+	+	+	++	++	++	++
24903	YKL054C	BY4743	11_1	221	A	1		0	+	0	0	0	+	+	+
24904	YKL055C	BY4743	11_1	221	A	2		+	+	0	+	0	0	+	+
24905	YKL056C	BY4743	11_1	221	A	3		0	+	0	0	+	+	+	+
24906	YKL057C	BY4743	11_1	221	A	4	slow growth on auxotrophy plate	0	0	0	0	++++	++++	++++	++++
25004	YKL154W	BY4743	11_2	221	A	5		0	+	0	0	+	+	+	+
25005	YKL155C	BY4743	11_2	221	A	6		0	0	0	0	+	+	+	+
25006	YKL156W	BY4743	11_2	221	A	7		+	0	0	0	0	+	+	+
25007	YKL157W	BY4743	11_2	221	A	8		0	0	0	0	+	+	+	+
25008	YKL158W	BY4743	11_2	221	A	9		0	+	0	0	+	+	+	+
25009	YKL159C	BY4743	11_2	221	A	10		0	+	0	0	+	+	+	+
25010	YKL160W	BY4743	11_2	221	A	11		0	0	0	0	0	+	+	+
25011	YKL161C	BY4743	11_2	221	A	12		+	+	0	0	+	+	+	+
25012	YKL162C	BY4743	11_2	221	B	1		0	+	0	0	+	+	++	++
25013	YKL163W	BY4743	11_2	221	B	2		0	+	0	0	+	+	+	+
25014	YKL164C	BY4743	11_2	221	B	3		+	+	+	0	0	+	+	+
25015	YKL165C	BY4743	11_2	221	B	4		+	+	0	0	+	+	+	++
25016	YKL166C	BY4743	11_2	221	B	5		0	+	0	+	0	0	+	+
25017	YKL167C	BY4743	11_2	221	B	6		0	0	0	0	0	0	+	+
25018	YKL168C	BY4743	11_2	221	B	7	slow growth on auxotrophy plate	+	+	0	+	+	0	++	++
25019	YKL169C	BY4743	11_2	221	B	8		0	+	0	0	++	+	+	++
25020	YKL170W	BY4743	11_2	221	B	10		+	0	0	+	+	+	+	+
25021	YKL171W	BY4743	11_2	221	B	11		0	0	+	+	+	+	+	++
25022	YKL172W	BY4743	11_2	221	B	12		+	+	0	0	0	+	+	+
25023	YKL173W	BY4743	11_2	221	C	1		+	+	0	0	0	+	+	++
25024	YKL174C	BY4743	11_2	221	C	2		0	0	+	0	+	+	+	+
25025	YKL175W	BY4743	11_2	221	C	3		0	+	0	0	++	+++	++	++++
25026	YKL176C	BY4743	11_2	221	C	4		0	0	+	+	+	+	+	+
25027	YKL177W	BY4743	11_2	221	C	5		0	0	0	0	+	0	+	++
25028	YKL178C	BY4743	11_2	221	C	6		+	+	0	+	+	+	+	+
25029	YKL179C	BY4743	11_2	221	C	7		+	+	0	0	+	+	++	++
25030	YKL180W	BY4743	11_2	221	C	8		0	+	0	0	0	+	+	+
25031	YKL181W	BY4743	11_2	221	C	9		+	+	+	+	+	+	+	+
25032	YKL182W	BY4743	11_2	221	C	10		0	+	0	0	0	0	+	+
25033	YKL183W	BY4743	11_2	221	C	11		+	+	0	0	0	0	+	+
25034	YKL184W	BY4743	11_2	221	C	12		+	+	0	0	+	+	+	+
25035	YKL185W	BY4743	11_2	221	D	1		+	0	+	0	+	+	+	++
25036	YKL186C	BY4743	11_2	221	D	2		0	0	0	0	+	++	+	++
25037	YKL187C	BY4743	11_2	221	D	3		++++	+++	+++	++++	0	0	0	+
25038	YKL188C	BY4743	11_2	221	D	4		0	+	0	+	+	0	+	+
25039	YKL189W	BY4743	11_2	221	D	5		+	+	0	0	+	+	+	+
25040	YKL190W	BY4743	11_2	221	D	6		+	0	0	0	+++	++	+++	+++
24657	YGR027C	BY4743	07_4	221	D	7	no growth on auxotrophy plate, no growth on glycerol plate	0	+	0	0	+	0	+	+
24659	YGR029W	BY4743	07_4	221	D	8		0	+	0	+	+	+	+	+
24660	YGR030C	BY4743	07_4	221	D	9		0	+	0	0	++	++	++	++
24661	YGR031W	BY4743	07_4	221	D	10		0	+	0	0	+	+	+	+
24663	YGR033C	BY4743	07_4	221	D	11	no growth on auxotrophy plate, slow growth on glycerol plate	0	0	0	+	+	0	+	+
24664	YGR034W	BY4743	07_4	221	D	12		+	+	0	0	0	0	+	+
24665	YGR035C	BY4743	07_4	221	E	1	no growth on auxotrophy plate	+	+	0	0	+	+++	++	++++
24666	YGR036C	BY4743	07_4	221	E	2		0	0	+	0	0	+	+	+
24667	YGR037C	BY4743	07_4	221	E	3	no growth on auxotrophy plate, slow growth on glycerol plate	+	+	0	0	+	+	+	+
24669	YGR039W	BY4743	07_4	221	E	4		+	0	0	0	+	+	0	+
24671	YGR041W	BY4743	07_4	221	E	5		0	+	0	+	+	+	+	+
24672	YGR042W	BY4743	07_4	221	E	6	no growth on auxotrophy plate	+	0	0	0	+	+	+	+
24673	YGR043C	BY4743	07_4	221	E	7		0	+	0	0	+	+	+	+
24674	YGR044C	BY4743	07_4	221	E	8		+	+	0	0	0	0	+	0
24675	YGR045C	BY4743	07_4	221	E	9		+	0	0	0	+	+	+	+
24677	YGR047C	BY4743	07_4	221	E	10		0	+	0	0	+	+	+	+
24679	YGR049W	BY4743	07_4	221	E	11		0	+	0	0	+	+	+	+
24681	YGR051C	BY4743	07_4	221	E	12	no growth on auxotrophy plate, slow growth on glycerol plate	+	+	0	+	+	0	+	+
24682	YGR052W	BY4743	07_4	221	F	1		0	0	0	0	+	+	++	++
24684	YGR054W	BY4743	07_4	221	F	2		+	+	+	+	+	+	+	++
24685	YGR055W	BY4743	07_4	221	F	3		+	0	0	+	+	++	++	+++
24686	YGR056W	BY4743	07_4	221	F	4		+	+	+	0	+	+	+	+
24687	YGR057C	BY4743	07_4	221	F	5		0	+	+	0	+	+	+	++
24688	YGR058W	BY4743	07_4	221	F	6		+	0	0	0	+	0	+	+
24689	YGR059W	BY4743	07_4	221	F	7		0	0	0	+	+	+	+	+
24690	YGR060W	BY4743	07_4	221	F	8		0	+	0	0	++	+++	++	+++
24691	YGR061C	BY4743	07_4	221	F	9		+	+	+	+	0	+	+	+
24692	YGR062C	BY4743	07_4	221	F	10		0	+	+	0	+	+	+	+
24694	YGR064W	BY4743	07_4	221	F	11		0	0	0	0	+	0	+	+
24695	YGR065C	BY4743	07_4	221	F	12		0	+	0	0	0	0	+	+
24696	YGR066C	BY4743	07_4	221	G	1		0	+	0	0	0	+	+	++
24697	YGR067C	BY4743	07_4	221	G	2		+	+	+	0	+	+	+	++
24698	YGR068C	BY4743	07_4	221	G	3		+	+	0	0	+	0	+	+
24699	YGR069W	BY4743	07_4	221	G	4		+	+	0	+	+	0	+	+
24700	YGR070W	BY4743	07_4	221	G	5		0	0	+	0	+	+	+	+++
24701	YGR071C	BY4743	07_4	221	G	6		+	+	0	0	+	+	+	+
24702	YGR072W	BY4743	07_4	221	G	7		0	+	0	0	+	+	+	++
24703	YGR073C	BY4743	07_4	221	G	8		0	0	0	0	++	+	++	++
24704	YGR074W	BY4743	07_4	221	G	9		+	+	0	+	+	+	+	+
24705	YGR075C	BY4743	07_4	221	G	10		0	+	0	+	+	+	+	++
24706	YGR076C	BY4743	07_4	221	G	11		0	+	+	0	0	0	+	+
24707	YGR077C	BY4743	07_4	221	G	12		0	0	0	+	0	0	+	+
24708	YGR078C	BY4743	07_4	221	H	1		+	+	+	+	+	+	+	+
24709	YGR079W	BY4743	07_4	221	H	2		+	+	0	0	+	+	+	+
24710	YGR080W	BY4743	07_4	221	H	3		0	+	0	0	+++	+++	++++	++
24711	YGR081C	BY4743	07_4	221	H	5		+	+	0	0	+	+	+	+
24713	YGR083C	BY4743	07_4	221	H	6		0	+	0	0	+	+	+	+
24714	YGR084C	BY4743	07_4	221	H	7		+	0	0	0	+	+	++	+
24715	YGR085C	BY4743	07_4	221	H	8		+	+	0	0	+	+	+	+
24717	YGR087C	BY4743	07_4	221	H	9		0	0	+	0	+	+	+	+
24718	YGR088W	BY4743	07_4	221	H	10		+	+	0	+	+	+	+	+
24720	YGR090W	BY4743	07_4	221	H	11		+	+	0	0	+	+	+	+
24721	YGR091W	BY4743	07_4	221	H	12		0	0	0	0	+	+	+	+
24907	YKL058W	BY4743	11_1	222	A	1		+	0	0	0	++	+	+	0
24908	YKL059C	BY4743	11_1	222	A	2	very slow growth on auxotrophy plate	0	0	+	+	++	++	+	+
24909	YKL060C	BY4743	11_1	222	A	3		0	+	+	0	+	+	+	+
24910	YKL061W	BY4743	11_1	222	A	4		+	0	0	0	+	+	+	+
24911	YKL062W	BY4743	11_1	222	A	5		0	+	0	0	+	+	+	+
24912	YKL063C	BY4743	11_1	222	A	6		+	+	0	0	+	0	+	+
24913	YKL064W	BY4743	11_1	222	A	7		+	0	0	0	+	+	0	+
24914	YKL065C	BY4743	11_1	222	A	8		0	0	0	0	+	+	0	0
24915	YKL066W	BY4743	11_1	222	A	9		+	0	0	0	++	+	+	+
24916	YKL067W	BY4743	11_1	222	A	10		+	+	0	0	+	+	+	0
24917	YKL068W	BY4743	11_1	222	A	11	very slow growth on auxotrophy plate	0	0	0	0	++	+	+	+
24918	YKL069W	BY4743	11_1	222	A	12		0	0	+	0	+	+	+	+
24919	YKL070W	BY4743	11_1	222	B	1		+	0	0	+	++	+++	+++	+++
24920	YKL071W	BY4743	11_1	222	B	2		0	0	+	0	+	0	+	+
24921	YKL072W	BY4743	11_1	222	B	3		0	0	0	0	+	+	+	0
24922	YKL073W	BY4743	11_1	222	B	4		0	0	0	0	+	+	+	+
24923	YKL074C	BY4743	11_1	222	B	5		0	0	+	+	+	+	+	++
24924	YKL075C	BY4743	11_1	222	B	6		+	0	0	0	+	0	+	+
24925	YKL076C	BY4743	11_1	222	B	7		+	+	+	0	+	+	+	+
24926	YKL077W	BY4743	11_1	222	B	8	no growth on auxotrophy plate	+	0	0	0	0	+	0	+
24927	YKL078W	BY4743	11_1	222	B	9		0	0	0	0	+	+	+	+
24928	YKL079W	BY4743	11_1	222	B	11		0	0	0	+	+	+	+	+
24929	YKL080W	BY4743	11_1	222	B	12		0	0	0	+	+	+	0	+
[truncated: 4,516 more rows]
